# Supplementary material for: French national health insurance database analysis and field study focusing on the impact of secure prescription pads on zolpidem consumption and sedative drug misuse: ZORRO study protocol
Source: PubMed Central journal article supplement — BMJ Open. 2019 Jun 28;9(6):e027443. doi: 10.1136/bmjopen-2018-027443 (PMC6609064; doi:10.1136/bmjopen-2018-027443), 2019-06-28
Supplement: bmjopen-2018-027443.draft_revisions.pdf [file bmjopen-2018-027443.draft_revisions.pdf]

# BMJ Open

BMJ Open is committed to open peer review. As part of this commitment we make the peer review history of every article we publish publicly available.

When an article is published we post the peer reviewers' comments and the authors' responses online. We also post the versions of the paper that were used during peer review. These are the versions that the peer review comments apply to.

The versions of the paper that follow are the versions that were submitted during the peer review process. They are not the versions of record or the final published versions. They should not be cited or distributed as the published version of this manuscript.

BMJ Open is an open access journal and the full, final, typeset and author-corrected version of record of the manuscript is available on our site with no access controls, subscription charges or pay-per-view fees (<http://bmjopen.bmj.com>).

If you have any questions on BMJ Open's open peer review process please email [editorial.bmjopen@bmj.com](mailto:editorial.bmjopen@bmj.com)

# BMJ Open

## ZORRO study Protocol – French healthcare reimbursement database analysis and field study focusing the impact's evaluation of secure prescription pads on zolpidem consumption and sedative drug misuse.

|                               |                                                                                                                                                                                                                                                                                                                                                                                                                                                                                                                                                                                                                                                                                                                                                                                                                                                                                                                                                                                                                                                              |
|-------------------------------|--------------------------------------------------------------------------------------------------------------------------------------------------------------------------------------------------------------------------------------------------------------------------------------------------------------------------------------------------------------------------------------------------------------------------------------------------------------------------------------------------------------------------------------------------------------------------------------------------------------------------------------------------------------------------------------------------------------------------------------------------------------------------------------------------------------------------------------------------------------------------------------------------------------------------------------------------------------------------------------------------------------------------------------------------------------|
| Journal:                      | <i>BMJ Open</i>                                                                                                                                                                                                                                                                                                                                                                                                                                                                                                                                                                                                                                                                                                                                                                                                                                                                                                                                                                                                                                              |
| Manuscript ID                 | bmjopen-2018-027443                                                                                                                                                                                                                                                                                                                                                                                                                                                                                                                                                                                                                                                                                                                                                                                                                                                                                                                                                                                                                                          |
| Article Type:                 | Protocol                                                                                                                                                                                                                                                                                                                                                                                                                                                                                                                                                                                                                                                                                                                                                                                                                                                                                                                                                                                                                                                     |
| Date Submitted by the Author: | 23-Oct-2018                                                                                                                                                                                                                                                                                                                                                                                                                                                                                                                                                                                                                                                                                                                                                                                                                                                                                                                                                                                                                                                  |
| Complete List of Authors:     | <p>Gerardin, Marie; University hospital of Nantes, Department of Clinical Pharmacology</p> <p>Rousselet, Morgane; University hospital of Nantes, Department of Clinical Pharmacology; INSERM , U1246 SPHERE "methodS in Patient-centered outcomes and HEalth ResEarch"</p> <p>Caillet, Pascal; University hospital of Nantes, Department of Clinical Pharmacology</p> <p>Grall-Bronnec, Marie; University Hospital of Nantes, Clinical Investigation Unit BALANCED "BehaviorAL AddictioNs and ComplEx mood Disorders"; INSERM , U1246 SPHERE "methodS in Patient-centered outcomes and HEalth ResEarch"</p> <p>Loue, Pierre; University Hospital of Rouen, Departement of General medical</p> <p>Jolliet, Pascale; University hospital of Nantes, Department of Clinical Pharmacology; INSERM , U1246 SPHERE "methodS in Patient-centered outcomes and HEalth ResEarch"</p> <p>Victorri-Vigneau, C; University Hospital of Nantes, Department of Clinical Pharmacology; INSERM , U1246 SPHERE "methodS in Patient-centered outcomes and HEalth ResEarch"</p> |
| Keywords:                     | zolpidem, secured prescription, change in law, impact, addictovigilance, Substance misuse < PSYCHIATRY                                                                                                                                                                                                                                                                                                                                                                                                                                                                                                                                                                                                                                                                                                                                                                                                                                                                                                                                                       |
|                               |                                                                                                                                                                                                                                                                                                                                                                                                                                                                                                                                                                                                                                                                                                                                                                                                                                                                                                                                                                                                                                                              |

SCHOLARONE™  
Manuscripts

1  
2  
3 1 **Title:** ZORRO study Protocol – French healthcare reimbursement database analysis and field study  
4  
5 2 focusing the impact’s evaluation of secure prescription pads on zolpidem consumption and sedative drug  
6  
7 3 misuse.  
8  
9

10 4  
11  
12 5 **Authors:**  
13

14 6 Marie GERARDIN, Clinical Pharmacology Department, Nantes University Hospital, Nantes, France,  
15  
16 7 9 quai Moncousu, 44 093 Nantes cedex 1, France. [marie.gerardin@chu-nantes.fr](mailto:marie.gerardin@chu-nantes.fr)  
17  
18

19 8 Morgane ROUSSELET, Clinical Pharmacology Department, Nantes University Hospital, Nantes,  
20  
21 9 France, 9 quai Moncousu, 44 093 Nantes cedex 1, France. Addictology and Psychiatry Department,  
22  
23 10 Nantes University Hospital, 85 rue de Saint-Jacques, 44093 Nantes cedex 1, France. INSERM U1246  
24  
25 11 SPHERE “methodS in Patient-centered outcomes and HHealth ResEarch”, Nantes and Tours University, 22  
26  
27 12 boulevard Benoni Goullin, 44 000 Nantes, France. [morgane.rousselet@chu-nantes.fr](mailto:morgane.rousselet@chu-nantes.fr)  
28  
29

30 13 Pascal CAILLET, Clinical Pharmacology Department, Nantes University Hospital, Nantes, France, 9  
31  
32 14 quai Moncousu, 44 093 Nantes cedex 1, France. [pascal.caillet@chu-nantes.fr](mailto:pascal.caillet@chu-nantes.fr)  
33  
34

35 15 Marie GRALL-BRONNEC, Addictology and Psychiatry Department, Nantes University Hospital, 85  
36  
37 16 rue de Saint-Jacques, 44093 Nantes cedex 1, France. INSERM U1246 SPHERE “methodS in Patient-  
38  
39 17 centered outcomes and HHealth ResEarch”, Nantes and Tours University, 22 boulevard Benoni Goullin, 44  
40  
41 18 000 Nantes, France. [marie.bronnec@chu-nantes.fr](mailto:marie.bronnec@chu-nantes.fr)  
42  
43

44 19 Pierre LOUE, General medical Departement, Rouen faculty of medicine, Rouen University  
45  
46 20 Hospital. [peterloue@me.com](mailto:peterloue@me.com)  
47

48 21 Pascale JOLLIET, Clinical Pharmacology Department, Nantes University Hospital, Nantes, France,  
49  
50 22 9 quai Moncousu, 44 093 Nantes cedex 1, France. INSERM U1246 SPHERE “methodS in Patient-centered  
51  
52  
53  
54  
55  
56  
57  
58  
59  
60

1  
2  
3 23 outcomes and HHealth ResEarch”, Nantes and Tours University, 22 boulevard Benoni Goullin, 44 000  
4  
5  
6 24 Nantes, France. [pascale.jolliet@univ-nantes.fr](mailto:pascale.jolliet@univ-nantes.fr)

7  
8 25 Caroline VICTORRI-VIGNEAU, Clinical Pharmacology Department, Nantes University Hospital,  
9  
10 26 Nantes, France, 9 quai Moncouso, 44 093 Nantes cedex 1, France. INSERM U1246 SPHERE “methodS in  
11  
12 27 Patient-centered outcomes and HHealth ResEarch”, Nantes and Tours University, 22 boulevard Benoni  
13  
14 28 Goullin, 44 000 Nantes, France. [caroline.vigneau@chu-nantes.fr](mailto:caroline.vigneau@chu-nantes.fr)

15  
16  
17 29 **Corresponding author:**

18  
19 30 Caroline VICTORRI-VIGNEAU

20  
21 31 Adress: Clinical Pharmacology Department, Nantes University Hospital, Nantes, France,

22  
23 32 9 quai Moncouso, 44 093 Nantes cedex 1, France

24  
25 33 Phone : +33240084073

26  
27 34 E-Mail : [caroline.vigneau@chu-nantes.fr](mailto:caroline.vigneau@chu-nantes.fr)

## 35 **ABSTRACT**

### 36 **Introduction**

37 In recent years, data collected by the French Addictovigilance Network (FAN) has shown the potential for  
38 abuse and addiction associated with zolpidem (the most sold hypnotic drug in France). Since the 10<sup>th</sup> of  
39 April 2017, new regulations have come into force that require zolpidem to be prescribed on special  
40 secure prescription pads, in order to reduce the risk of abuse or misuse. This measure has far reaching  
41 repercussions that are not only limited to the consumption of zolpidem but also extend to the usage of  
42 sedative medication on a whole.

43 The objective of the ZORRO study (ZOlpidem and the Reinforcement of the Regulation of prescription  
44 Orders) is to evaluate the overall impact of the new regulatory framework requiring that zolpidem be  
45 prescribed on special secure prescription pads. The overall impact will be evaluated according to three  
46 axes: the impact on the number of consumers, on the type of consumption (chronic use versus  
47 occasional use, problematic consumption versus non-problematic use), and on the consumption of other  
48 sedative molecules.

### 49 **Methods and analysis**

50 The ZORRO study is an epidemiological, observational, national multi-center, non-controlled, prospective  
51 research project supported by the French National Agency for Medicines and Health Products Safety  
52 (ANSM). The evaluation of the impact of the regulatory framework change relative to zolpidem will be  
53 done on the one hand via an epidemiological study of the French National Health Insurance data base  
54 and on the other hand by the implementation of field studies of prescribers and consumers of zolpidem.

### 55 **Ethics and dissemination**

56 The local Research Ethics Committee (GNEDS) approved this study on 3 March 2018. Results will be  
57 presented in national and international conferences and submitted to peer-reviewed journals.

58 **Trial registration number** NCT03584542

1  
2  
3  
4 59  
5 60 **Keywords**  
6  
7 61 Zolpidem, secured prescription, change in law, impact, addictovigilance, misuse.  
8  
9 62

10  
11 63 **ARTICLE SUMMARY**

12  
13 64 **Strengths and limitations of the study**

14  
15 65 This study will contribute to setting up an innovative impact measure in order to evaluate the efficacy of  
16  
17 66 institutions' response to the issue of zolpidem misuse and dependence.

18  
19  
20  
21 67 The study will be representative of the French population by use of the French healthcare database  
22  
23 68 SNDS, with a focus on how physicians and problematic consumers have coped with the change in law by  
24  
25 69 use of complementary field studies.

26  
27  
28 70 Owing to technical constraints inherent to medico-administrative database use, use of drug not  
29  
30 71 reimbursed will not be observable in the SNDS database, as well as many clinical data that are not  
31  
32 72 routinely gathered.

33  
34  
35  
36 73 A lack of representativity may occur during participants' recruitment regarding the part of the project  
37  
38 74 involving field sampling.

39  
40  
41 75  
42  
43  
44  
45  
46  
47  
48  
49  
50  
51  
52  
53  
54  
55  
56  
57  
58  
59  
60

## 76 INTRODUCTION

77 Zolpidem is a medicinal substance that has been the target of a number of regulatory framework  
78 changes in both French national and international spheres. Worldwide, a number of cases of misuse of  
79 zolpidem have been described (Europe and the United-States [1, 2]). The World Health Organisation  
80 (WHO) believes that the frequency of cases of abuse or addiction to zolpidem is similar to that associated  
81 with hypnotic benzodiazepines [3] and in a ruling of July 15th 2002, zolpidem was placed by the United  
82 Nations in the table IV of the Vienna convention which aims to control the abuse and trafficking of  
83 psychotropic substances.

84 In France, the French Addictovigilance network (FAN), piloted by the French National Agency for  
85 Medicines and Health Products Safety (ANSM) is in charge of the surveillance of cases of abuse and  
86 addiction associated with any drug or substance with a psychoactive effect. The surveillance is based on  
87 a network of 13 Centre for evaluation of and information on drug dependence and addiction monitoring  
88 (CEIP-A), who evaluate the addictive potential of a given drug via notifications provided by health  
89 professionals [4], and via specifically developed pharmaco-epidemiology tools [5, 6].

90 Some controlled medicines and psychotropic substances are under reinforced surveillance by the ANSM  
91 as they are associated with a risk of misuse and addiction. As is the case for zolpidem. In France,  
92 zolpidem is enlisted on the list I of harmful substances, that is to say it is considered as a substance  
93 associated with a health risk. An initial national survey of the addictovigilance network in 2002 found  
94 serious and worrying cases of abuse and addiction to zolpidem. The 2002 survey revealed the existence  
95 of two consumer groups: a population of chronic high dosage consumers with a therapeutic usage of  
96 zolpidem, and a population of "misusers" in search of an effect other than hypnotic (euphoria, wellbeing  
97 or stimulant effect). The same survey also found, via the analysis of the FAN pharmaco-epidemiology  
98 tools, that zolpidem is a substance prone to abuse [7]. Following to this conclusion the Summary of  
99 Product Characteristics (SPC) of zolpidem was modified, with notably the addition of a warning with

1  
2  
3 100 respect to addiction. In June 2011, an update of data relative to the addictive potential of zolpidem,  
4  
5 101 presented before the National Commission of Narcotics and Psychotropic Substances (CNSP), found the  
6  
7 102 same two consumer groups as in the 2002 survey, with cases of seemingly increasing gravity associated  
8  
9 103 with the consumption of particularly high dosages [8]. In light of these results, the prescription of  
10  
11 104 zolpidem on special secure prescription pads was put forward by the CNSP. In 2012, the FAN tools all,  
12  
13 105 once again, proclaim zolpidem as a problematic substance.  
14  
15

16  
17 106 The analytical and surveillance tools of the FAN allow for the identification of the problem of addiction,  
18  
19 107 they also provide transversal data relative to specific population groups, however they do not provide a  
20  
21 108 general population risk profile, nor a comparison to other molecules. A research program based on the  
22  
23 109 French National Health Insurance data base, allowed for the collection of quantitative data in the general  
24  
25 110 population via an analysis of the usage of zolpidem and zopiclone [9]. The results of this research  
26  
27 111 program provided the identification of a number of different clinical profiles of zolpidem consumers: (i)  
28  
29 112 « non-problematic » consumers, the largest group; (ii) individuals who could have developed a tolerance  
30  
31 113 to the hypnotic effects of zolpidem, for whom the prescription of alternative hypnotic/anxiolytic  
32  
33 114 medication is justified; (iii) potential problematic consumers of zolpidem (1%) (high rate of fraudulent  
34  
35 115 behavior, excessive usage, non-respect of guidelines and medical-pharmaceutical nomadism). In 2017,  
36  
37 116 another research program gave insight into the characteristics of the two aforementioned consumer  
38  
39 117 groups via the analysis of reports from health professionals [10].  
40  
41  
42

43  
44 118 Following to these results, on the 11th of January 2017, the ANSM decreed that as from April the 10<sup>th</sup>  
45  
46 119 2017, the prescription of zolpidem was to be done on secure prescription pads [11]. The ANSM stated  
47  
48 120 that « this measure is taken in order to limit the risk of abuse and misuse » and « to encourage correct  
49  
50 121 usage ». In a country where the consumption of psychotropic drugs is high, a ruling that impacts the  
51  
52 122 most sold hypnotic drug [12, 13] will disrupt not only its' usage but also on a larger scale the overall  
53  
54  
55



1  
2  
3 123 prescription of sedative substances. The current project aims to develop a means to measure the impact  
4  
5 124 of this new ruling, in the scope of works of the ANSM, that is to say, in terms of the reduction of the risk  
6  
7  
8 125 of abuse, the improvement of correct use of zolpidem and the change in prescriptions of sedative  
9  
10 126 molecules. This project forms part of the evaluation of zolpidem done by the Nantes CEIP-A, the  
11  
12 127 organization in charge of its follow up. In addition to the tools used by the FAN [5], this project will allow  
13  
14 128 for a longitudinal evaluation of the trajectories of different patients, as well as providing insight into the  
15  
16  
17 129 general population.  
18  
19 130

## 21 131 **METHODS AND ANALYSIS**

### 23 132 **Aim**

25 133 The objective of the ZORRO study (Zolpidem and the Reinforcement of the Regulation of prescription  
26  
27 134 Orders) is to evaluate the overall impact of the obligation to use secure prescription pads for zolpidem.  
28  
29  
30 135 We propose a multimodal approach that will provide valuable insight into three key questions: 1) what is  
31  
32 136 the impact of this measure on the number of consumers? 2) What is the impact of this measure on the  
33  
34 137 type of consumption? 3) What is the impact of this measure on the consumption of other sedative  
35  
36  
37 138 molecules?  
38

### 39 139 **Study design**

41 140 This scientific project is based on a multimodal epidemiological approach, which combines a  
42  
43 141 retrospective cohort study involving the use of the French National Health Information data base (SNDS,  
44  
45 142 formerly known as the French National Inter-schemes Health Insurance data base (SNIIRAM)) [14] and a  
46  
47  
48 143 transversal study involving the gathering in-field of clinical data of different populations: general  
49  
50 144 practitioners that prescribe zolpidem as well as consumers (both patients having consulted a general  
51  
52 145 practitioner and those having recourse to specialized care centers dedicated to drug dependence). To  
53  
54 146 our knowledge, a study of this amplitude does not exist in France.  
55

1  
2  
3 147 These two approaches will provide insight into three key areas:  
4

- 5 148 - To evaluate the impact of the measure on the number of consumers, we will estimate via the  
6  
7 149 SNDS data base the prevalence and the incidence of zolpidem consumers in the general  
8  
9 population before and after the regulatory framework change.  
10 150  
11  
12 151 - To evaluate the impact of the measure on the type of consumption, we will explore the changes  
13  
14 152 in the modes of consumption: occasional use *versus* chronic use and problematic use *versus* non-  
15  
16 153 problematic use. Problematic use is defined as a consumption outside of the SPC guidelines for at  
17  
18 154 least one of the following parameters: the duration of consumption, the dosage, the means of  
19  
20 155 procurement, the routes of administration or the search for an effect other than hypnotic. This  
21  
22 156 evaluation will be done both from SNDS data base for the evaluation of the general population  
23  
24 157 and from the field studies for the evaluation of problematic consumers of zolpidem (patients of  
25  
26 158 general practitioners and users of specialized care centers dedicated to drug dependence).  
27  
28 159 - To evaluate the impact of the measure on the consumption of other sedative molecules, we will  
29  
30 160 analyze the reporting of prescriptions and the changes observed both in the general population  
31  
32 161 in the SNDS data base as well as among prescribers and problematic consumers of zolpidem  
33  
34 162 (patients of general practitioners and users of specialized care centers for users of specialized  
35  
36 163 care centers dedicated to drug dependence).  
37  
38  
39  
40

#### 41 164 **Setting of the study**

42  
43 165 The Nantes CEIP-A, is the national investigating center in charge of the management, surveillance and  
44  
45 166 coordination of the entire project. General practitioners, their patients and users of zolpidem will be  
46  
47 167 recruited across France. The gathering and the analysis of data (SNDS data base and field studies) will be  
48  
49 168 centralized by the Nantes CEIP-A.  
50

51  
52 169 A multi-disciplinary pilot committee, comprised of pharmacologists, general practitioners, a  
53  
54 170 methodologist bio-statistician, a clinical study technician and of an addictologist psychiatrist, has been  
55

56 8  
57  
58  
59  
60

1  
2  
3 171 constituted in order to define the research protocol and in order to insure the scientific and  
4  
5 172 methodological validity of the study.  
6  
7

8 173

9  
10 174 **Patient and public involvement**  
11

12 175

13  
14 176 Patients were not involved in the design of the study.  
15  
16

17 177

18 178 **Populations**  
19

20 179

21  
22 180 *Analysis of the SNDS database*  
23  
24

25 181

26  
27 182 The study sample will include all patients in the database during the period from the 1<sup>st</sup> of January 2016  
28  
29 183 to the 31<sup>st</sup> of December 2018. The target population of our research will be constituted of consumers of  
30  
31 184 zolpidem present in the SNDS database between the 1<sup>st</sup> of January 2016 and the 31<sup>st</sup> of December 2018.  
32  
33

34 185

35  
36 186 *Field study among General practitioners*  
37  
38

39 187

40  
41  
42 188 Practitioners, situated within the national borders, will be randomly selected from the list of the National  
43  
44 189 Health Insurance for Wage laborers (CNAMTS). Practitioners specialized in the care of addictions and  
45  
46 190 used to working with the FAN, will also be solicited [15]. All practitioners with an independent practice at  
47  
48 191 the time of change in regulatory framework and who agree to participate, via oral consent, will be  
49  
50 192 included.  
51  
52

53 193  
54  
55  
56  
57  
58  
59  
60

1  
2  
3 194 *Field study among problematic consumers of zolpidem (patients of general practitioners and users of*  
4  
5 195 *specialized care centers dedicated to drug dependence)*  
6  
7  
8  
9 196

10  
11 197 Patients of general practitioners will be selected by participating practitioners. Users can also be selected  
12  
13 198 by participating specialized care centers dedicated to drug dependence (addiction care and prevention  
14  
15 199 centers (CSAPA) and drug-user risk reduction centers (CAARUD). All subjects (patients and users) with a  
16  
17 200 problematic usage of zolpidem before the coming into force of the new regulatory framework and who  
18  
19 201 provide their oral consent to participate, will be included in the study. A problematic consumption of  
20  
21 202 zolpidem will be defined according to the DSM 5 criteria of substance use disorder. Under aged or  
22  
23 203 protected individuals as well as subjects with French language difficulties (understanding, reading or  
24  
25 204 writing) incompatible with the filling out of a questionnaire, will not be included in the study.  
26  
27  
28  
29 205

## 30 206 **Materials**

31  
32 207

### 33 34 208 *Analysis of the SNDS database*

35  
36 209

37  
38  
39 210 The SNDS data base is described in detail in the publication by Martin-Latry *et al* [14] as well as on related  
40  
41 211 internet sites [16, 17]. The data analyzed will be sociodemographic data of the patients and the  
42  
43 212 medication delivered to them (denomination, quantity, medical specialty of the prescribing practitioner).  
44  
45 213 The access to the data will be done in accordance with current rulings and practice.  
46  
47

48 214

### 49 215 *Field study among general practitioners*

50  
51 216  
52  
53  
54  
55  
56  
57  
58  
59  
60

1  
2  
3 217 Participating general practitioners will reply to short telephone questionnaire, which will gather  
4  
5 218 information on their perceptions and their prescription strategy following to the new regulatory  
6  
7 219 framework (continuation of zolpidem on a secure prescription pad, prescription of a different sedative  
8  
9 220 drug, cease in hypnotic prescriptions). The criteria for their choices will also be explored.  
10  
11

12 221

13  
14 222 *Field study among problematic consumers of zolpidem (patients and users)*  
15

16 223

17  
18 224 Patients and users will fill out a two-part auto-questionnaire. The first part will evaluate the consumption  
19  
20 225 of zolpidem before the coming into force of the new regulatory framework (dosages used, duration,  
21  
22 226 pursued effects and effects felt) and their change or not after the coming into force of the new  
23  
24 227 regulatory framework (cease, change in dosage, relay to another drug or sedative substance). The  
25  
26 228 second part of the questionnaire will be filled out only by patients or users for whom a change is  
27  
28 229 observed and it will gather information pertaining to the favored replacement substance (dosages used,  
29  
30 230 duration, pursued effects and effects felt).  
31  
32

33 231

34  
35 232 **Study size**  
36

37 233

38  
39 234 *Analysis of the SNDS database:*  
40

41  
42 235 In light of the retrospective nature of the study and of the data bases used, the calculation of a power is  
43  
44 236 not necessary, in accordance with the good practice guidelines of the European Network of Centers for  
45  
46 237 Pharmaco-epidemiology and Pharmacovigilance [18].  
47  
48

49 238

50  
51 239 *Field studies among prescribing general practitioners and problematic consumers of zolpidem:*  
52  
53  
54  
55

1  
2  
3 240 Three hundred practitioners will be selected in order to insure that at least one hundred practitioners  
4  
5 241 participate in the recruitment of problematic consumers of zolpidem. For feasibility reasons, the number  
6  
7 242 of general practitioner patients to be included depends upon the construction of a convenience sample.  
8  
9  
10 243 This sample is estimated to be about 200 patients. Furthermore, 200 users will be recruited via the  
11  
12 244 specialized care centers dedicated to drug dependence.  
13  
14  
15 245

## 16 17 246 **Statistical methods**

18  
19 247 All variables will undergo a descriptive analysis. Quantitative variables will be described using usual  
20  
21 248 position (mean or median) and dispersion (standard deviation, interquartile range) parameters. The  
22  
23 249 normality of their distribution will be assessed numerically (normality test) and graphically. For normally  
24  
25 250 distributed quantitative variables, mean and standard deviation will be used. For non-normally  
26  
27 251 distributed variables, median and interquartile ranges will be used. Qualitative variables will be  
28  
29 252 described using number and frequency tables for each parameter. All analysis will be conducted with SAS  
30  
31 253 software. Specific statistical methods will be implemented in order to answer each question adequately.  
32  
33  
34  
35 254

36  
37 255 *Impact of the measure on the number of consumers: estimation of prevalence and incidence of zolpidem*  
38  
39 256 *users within the SNDS database before and after the regulatory framework change.*  
40  
41

42 257  
43  
44 258 A number of periods will be studied (figure 1). The proportion of patients having received at least one  
45  
46 259 delivery of zolpidem during the period 2 and during the period 4 will be compared using a Mc Nemar test  
47  
48 260 for paired proportion. Patients missing from one of the two periods will be recorded as non-users. The  
49  
50 261 significance threshold will be fixed at 5%. An incident user will be defined as a patient receiving a first  
51  
52 262 delivery of zolpidem without any prior delivery over the preceding 6 months. The number of incident  
53  
54  
55

263 users within each period will be compared using a Poisson model. The significance threshold for each  
264 coefficient will be fixed at 5%.

265

266 *Impact on the type of consumption regarding changes in treatment duration*

267

268 *Within the SNDS database:* The length of the first treatment episode will be evaluated by  
269 calculating the number of days covered by the initial delivery (theoretical length of treatment). The  
270 predicted variable will be the duration of treatment over a threshold (yes/no). The period will be entered  
271 as a covariate in the model, enabling the study of the effect of the period on the probability of the  
272 treatment being chronic while taking into account the correlation of treatment characteristics for a given  
273 patient.

274 *Within the field study among problematic consumers of zolpidem:* A descriptive analysis will be  
275 performed, with the characterization of the duration of treatment with zolpidem before the regulatory  
276 framework change and of the duration of treatment with zolpidem or of the replacement  
277 drug/substance after the regulatory framework change.

278

279 *Impact on the type of consumption addressing changes in the type of consumption, problematic or non-*  
280 *problematic:*

281

282 *Within the SNDS database:* A latent class analysis (LCA) will be conducted within each period,  
283 including the following variables: age, sex, presence of a chronic disease, poor economic status,  
284 prescribing practitioners specialty (only whether or not a general practitioner), number of different  
285 prescribing practitioners (doctor shopping), number of dispensing pharmacies (pharmacy shopping),  
286 excess use (mean monthly medication possession ratio [19] (MPR) > 1 during the period), adherence to

13

1  
2  
3 287 French good practice guidelines regarding hypnotics, presence of an associated psychiatric disorder. The  
4  
5 288 analysis will be repeated during periods 2 and 4. In order to study the transitions between clusters over  
6  
7 289 time, a latent transition analysis (LTA) will be performed. The choice of the best model will be made  
8  
9 290 considering Bayesian Information Criterion (BIC). The choice of the best model will also be made with  
10  
11 291 consideration to the stability of the model (proportion of convergences among the 5000 iterations), the  
12  
13 292 BIC (lower is better) and the interpretability of the model.  
14  
15  
16  
17 293

18  
19 294 *Within the field observational study among problematic consumers of zolpidem: A descriptive*  
20  
21 295 *analysis will be performed. We will compare the number and the distribution of the positives criteria of*  
22  
23 296 *problematic consumers (patients et users) before (for zolpidem treatment) and after the coming into*  
24  
25 297 *force of the new regulatory framework (for zolpidem treatment or replacement substances): duration of*  
26  
27 298 *consumption, dosage, manner in which zolpidem or other substance is obtained, route of administration*  
28  
29 299 *or pursued effects different from the expected effect of the treatment or substance. Parametric or non-*  
30  
31 300 *parametric paired-tests will be used for comparisons, according to the distributions of each variable. For*  
32  
33 301 *each hypothesis test, an alpha risk of 5% will be used. In case of multiple testing, a correction of the*  
34  
35 302 *significance threshold will be applied to avoid alpha risk inflation (Hochberg's method).*  
36  
37  
38  
39 303

40  
41 304 *Impact on the consumption of other sedative molecules: analysis of prescription deferrals and switches*  
42  
43  
44 305

45  
46 306 *Within the SNDS database, regarding characterization of consumption trajectories:*  
47

48 307 First of all, a time series analysis will be performed on aggregated monthly data (proportion of users per  
49  
50 308 month) to compare the changes in the consumption of zolpidem and other sedatives across all the study  
51  
52 309 periods. Cross-correlation between the different time series will be studied in order to identify if  
53  
54  
55



1  
2  
3 310 zolpidem users have shifted their consumption to other drugs since the change in regulatory framework.  
4  
5  
6 311 Secondly, a sequence analysis will be performed using dedicated tools (TramineR, SeqHMM and  
7  
8 312 arulesSequences packages in R software). This will include a cluster analysis of the sequences, in order to  
9  
10 313 identify typical trajectories in consumption and their modification following to the change in the  
11  
12 314 regulatory framework.

14 315 *Within the field study among physicians:* A descriptive analysis of changes in prescription  
15  
16 316 behavior and motives for change will be performed.

18 317 *Within the field study among problematic consumers of zolpidem:* A descriptive analysis of the  
19  
20 318 number of molecules tried as a replacement and the molecules that best replaced zolpidem, if  
21  
22 319 applicable, after the change in regulatory framework, will be performed. In patients stopping zolpidem,  
23  
24 320 but switching to another molecule, a univariate analysis of the same variables will be conducted in order  
25  
26 321 to describe the use of zolpidem before the coming into force of the new regulatory framework and the  
27  
28 322 use of other sedative drugs used in place of zolpidem after the coming into force of the new regulatory  
29  
30 323 framework. For each hypothesis test, an alpha risk of 5% will be used. In case of multiple testing, a  
31  
32 324 correction of the significance threshold will be applied to avoid alpha risk inflation (Hochberg's method).  
33  
34  
35  
36  
37  
38

## 39 326 **DISCUSSION**

40  
41 327  
42  
43 328 The evaluation of the addictive power of zolpidem by the addictovigilance network, required over the  
44  
45 329 past, above and beyond the tools of the CEIP-A, the implementation of specific research programs. The  
46  
47 330 evaluation of the impact of the change in the regulatory framework will similarly require the  
48  
49 331 implementation of specific research programs. This project offers a design and a methodology which are  
50  
51 332 complementary to the tools of the CEIP-A [4], indispensable to the measurement of the impact, that we  
52  
53 333 believe to be major, of a change in the prescription requirements of the most sold hypnotic in France.  
54  
55

1  
2  
3 334 The ZORRO project aims to develop a method to measure the impact of the change in regulatory  
4  
5 335 framework on practitioners' prescriptions of sedative molecules. This evaluation is complex, as in order  
6  
7 336 to be thorough it must precisely measure the different aspects of the consequences of the regulatory  
8  
9 337 framework change, both from a quantitative and qualitative point of view. Rather than doing a single  
10  
11 338 study, we prefer to employ a strategy based on a number of different, and complementary,  
12  
13 339 methodological approaches. We have anticipated some possible bias: for the analysis of information  
14  
15 340 from a data base, we chose the data from the SNDS base as it contains information close to that of the  
16  
17 341 real consumption (more so than the sales figures of pharmaceutical laboratories for example).  
18  
19 342 Concerning the periods of reference BEFORE and AFTER, we have voluntarily chosen periods distant from  
20  
21 343 the times of announcement and the coming into force of the change in regulatory framework in order to  
22  
23 344 minimize bias linked to the transition period. Although, the regulatory framework change came into  
24  
25 345 force in April 2017, the ANSM had published information on the measure as from January 2017. A part of  
26  
27 346 the practitioners that prescribe zolpidem therefore anticipated the change in the regulatory framework  
28  
29 347 and started to change their prescription strategy as from January 2017. One of the limits of the SNDS  
30  
31 348 data base, that justifies our multimodal approach, is the complete absence of clinical information  
32  
33 349 concerning the effects pursued or felt by patients, as well as the modification in routes of administration.  
34  
35 350 Concerning the in-field clinical study, the principal bias is a memory bias of the questioned subjects. The  
36  
37 351 time between the change in the regulatory framework and the implementation of the study is however  
38  
39 352 incompressible as it is necessary to give patients and users sufficient hindsight in order to evaluate the  
40  
41 353 changes in their consumption of zolpidem. In fact, the questions have been formulated in a simplified  
42  
43 354 manner, and our project targets the most problematic consumers, who should remember with little  
44  
45 355 difficulty the changes, having an impact on their daily lives, following to the new regulatory framework.  
46  
47 356 A possible declarative bias does exist among patients and users, although this bias was taken into  
48  
49  
50  
51  
52  
53  
54  
55  
56  
57  
58  
59  
60

1  
2  
3 357 account, in order to minimize it, in the conception of the questionnaire. On the one hand the  
4  
5  
6 358 questionnaire is completely anonymous. On the other hand, for patients, the questionnaire is filled-in  
7  
8 359 away from any medical presence and handed back in a sealed envelope that is opened only by the  
9  
10 360 Nantes CEIP-A for data analysis. The subjects recruited via specialized care centers dedicated to drug  
11  
12 361 dependence are used to being questioned on their substance consumption by the CEIP-A personnel, in  
13  
14 362 the framework of their mission of surveillance of cases of addition to and abuse of psychoactive  
15  
16 363 substances. Our personnel have therefore developed an expertise in the realization of projects of this  
17  
18 364 type among the users of specialized care centers dedicated to drug dependence. The strengths of this  
19  
20 365 project lie within its' multimodal approach that allows, on the one hand, to document numerous  
21  
22 366 possible consequences of the regulatory framework change, and on the other hand, to insure the overall  
23  
24 367 coherence of the different studies via the management by an expert team in the field, coordinated by  
25  
26 368 the French national reference center on the addictive potential of zolpidem. This project may very well  
27  
28 369 have a double impact: On the one hand, it will provide additional data essential to the ANSMs' mission of  
29  
30 370 surveillance of the risk relative to overdose, abuse, addiction and misuse of sedative substances ; On the  
31  
32 371 other hand, this project could be the defining point of a series of steps (communication and information  
33  
34 372 campaigns , ...) designed to manage the public health issues surrounding zolpidem and to measure their  
35  
36 373 overall impact.  
37  
38  
39  
40  
41  
42

43 375 **ETHICS AND DISSEMINATION:**  
44  
45 376 **Ethics approval**  
46  
47 377 The protocol was approved on the 11/06/2018 by the Committee for the Protection of the Population  
48  
49 378 (CPP) and on the 12/04/2018 by the Committee of Expertise in Research, Studies and Evaluations in the  
50  
51 379 Field of Health (CEREES). It was also submitted to the National Commission of Information Technology  
52  
53 380 and Liberties (CNIL).  
54  
55  
56  
57  
58  
59  
60

1  
2  
3 381 **Information to participants**  
4

5 382 For the epidemiological analysis of the SNDS database: Not applicable  
6

7 383 Practitioners: all practitioners will receive clear information regarding the study orally during the  
8  
9  
10 384 telephone interview. Practitioners that participate in the recruitment of patients will also receive written  
11  
12 385 information.  
13

14 386 Patients and users: general practitioners and the study agents in the specialized care centers dedicated  
15  
16 387 to drug dependence agree to inform all patients and users, in a clear and impartial manner, about the  
17  
18 388 protocol. They will also provide written information.  
19

20  
21 389 **Consent to participate**  
22

23 390 For the epidemiological analysis of the SNDS database: Not applicable  
24

25 391 Practitioners: oral non-refusal to participate will be sought before delivery of the telephone  
26  
27 392 questionnaire. Practitioners that accept to reply to the telephone questionnaire will be considered as not  
28  
29 393 in opposition of the study. For the recruitment of patients, practitioners that fill in the documents  
30  
31 394 relative to the inclusion of a patient will be considered as agreeing to participate in the study.  
32  
33

34 395 Patients and users: oral non-refusal from patients and users will be sought. Subjects (patients or users)  
35  
36 396 that fill out an auto questionnaire will be considered as agreeing to participate in the study.  
37  
38

39 397 **Consent for publication**  
40

41 398 The written information documents provided to practitioners, patients and users, state that the  
42  
43 399 anonymous information gathered during the study is likely to be used in scientific publications and public  
44  
45 400 communications.  
46

47 401 **Availability of data and material**  
48

49 402 Not applicable  
50  
51

52 403  
53  
54  
55  
56

404 **REFERENCES**

- 405 1. Hajak G, Müller WE, Wittchen HU, Pittrow D, Kirch W. Abuse and dependence potential for the non-  
406 benzodiazepine hypnotics zolpidem and zopiclone: a review of case reports and epidemiological data.  
407 *Addict Abingdon Engl.* 2003;98:1371–8.
- 408 2. Yen C-F, Yen C-N, Ko C-H, Hwang T-J, Chen C-S, Chen T-T, et al. Correlates of dependence and beliefs  
409 about the use of hypnotics among zolpidem and zopiclone users. *Subst Use Misuse.* 2015;50:350–7.
- 410 3. Comité OMS d'experts de la pharmacodépendance (1998 : Genève S, Organization WH. Comité OMS  
411 d'experts de la pharmacodépendance : trente et unième rapport. WHO Expert Committee on Drug  
412 Dependence : thirty-first report. 1999. <http://apps.who.int/iris/handle/10665/42285>. Accessed 17 Aug  
413 2018.
- 414 4. Jouanjus E, Gibaja V, Kahn J-P, Haramburu F, Daveluy A. Signal identification in addictovigilance: the  
415 functioning of the French system. *Therapie.* 2015;70:113–31.
- 416 5. Micaleff J, Jolliet P, Victorri-Vigneau C, Mallaret M, Richard N, Haramburu F, et al. [First meeting of the  
417 French CEIP (centres d'évaluation et d'information sur la pharmacodépendance). Assessment of the  
418 abuse and pharmacodependence potential during drug development]. *Therapie.* 2008;63:55–65.
- 419 6. Jouanjus E, Guernec G, Lapeyre-Mestre M, French Addictovigilance Network. Medical prescriptions  
420 falsified by the patients: a 12-year national monitoring to assess prescription drug diversion. *Fundam Clin*  
421 *Pharmacol.* 2018.
- 422 7. Victorri-Vigneau C, Dailly E, Veyrac G, Jolliet P. Evidence of zolpidem abuse and dependence: results of  
423 the French Centre for Evaluation and Information on Pharmacodependence (CEIP) network survey. *Br J*  
424 *Clin Pharmacol.* 2007;64:198–209.

- 1  
2  
3 425 8. Victorri-Vigneau C, Gérardin M, Rousselet M, Guerlais M, Grall-Bronnec M, Jolliet P. An update on  
4  
5 426 zolpidem abuse and dependence. *J Addict Dis.* 2014;33:15–23.  
6  
7  
8  
9 427 9. Victorri-Vigneau C, Feuillet F, Wainstein L, Grall-Bronnec M, Pivette J, Chaslerie A, et al.  
10  
11 428 Pharmacoepidemiological characterisation of zolpidem and zopiclone usage. *Eur J Clin Pharmacol.*  
12  
13 429 2013;69:1965–72.  
14  
15  
16 430 10. Rousselet M, Feuillet F, Gerardin M, Jolliet P, Hardouin J-B, Victorri-Vigneau C. The French  
17  
18 431 addictovigilance network clinical assessment: Z-drugs, true false twins. *Expert Opin Drug Saf.*  
19  
20 432 2017;16:1063–9.  
21  
22  
23  
24 433 11. ANSM : Agence nationale de sécurité du médicament et des produits de santé. Prescription  
25  
26 434 obligatoire du zolpidem sur ordonnance sécurisée - Point d'Information. 2017.  
27  
28 435 [http://www.ansm.sante.fr/S-informer/Points-d-information-Points-d-information/Prescription-](http://www.ansm.sante.fr/S-informer/Points-d-information-Points-d-information/Prescription-obligatoire-du-zolpidem-sur-ordonnance-securisee-Point-d-Information)  
29  
30 436 [obligatoire-du-zolpidem-sur-ordonnance-securisee-Point-d-Information](http://www.ansm.sante.fr/S-informer/Points-d-information-Points-d-information/Prescription-obligatoire-du-zolpidem-sur-ordonnance-securisee-Point-d-Information). Accessed 17 Apr 2018.  
31  
32  
33  
34 437 12. ANSM : Agence nationale de sécurité du médicament et des produits de santé. Etat des lieux en 2013  
35  
36 438 de la consommation des benzodiazépines en France - Point d'Information. 2014. [http://ansm.sante.fr/S-](http://ansm.sante.fr/S-informer/Points-d-information-Points-d-information/Etat-des-lieux-en-2013-de-la-consommation-des-benzodiazepines-en-France-Point-d-Information)  
37  
38 439 [informer/Points-d-information-Points-d-information/Etat-des-lieux-en-2013-de-la-consommation-des-](http://ansm.sante.fr/S-informer/Points-d-information-Points-d-information/Etat-des-lieux-en-2013-de-la-consommation-des-benzodiazepines-en-France-Point-d-Information)  
39  
40 440 [benzodiazepines-en-France-Point-d-Information](http://ansm.sante.fr/S-informer/Points-d-information-Points-d-information/Etat-des-lieux-en-2013-de-la-consommation-des-benzodiazepines-en-France-Point-d-Information). Accessed 17 Apr 2018.  
41  
42  
43  
44 441 13. ANSM : Agence nationale de sécurité du médicament et des produits de santé. Etat des lieux de la  
45  
46 442 consommation des benzodiazépines - Point d'Information. 2017. [http://ansm.sante.fr/S-informer/Points-](http://ansm.sante.fr/S-informer/Points-d-information-Points-d-information/Etat-des-lieux-de-la-consommation-des-benzodiazepines-Point-d-Information)  
47  
48 443 [d-information-Points-d-information/Etat-des-lieux-de-la-consommation-des-benzodiazepines-Point-d-](http://ansm.sante.fr/S-informer/Points-d-information-Points-d-information/Etat-des-lieux-de-la-consommation-des-benzodiazepines-Point-d-Information)  
49  
50 444 [Information](http://ansm.sante.fr/S-informer/Points-d-information-Points-d-information/Etat-des-lieux-de-la-consommation-des-benzodiazepines-Point-d-Information). Accessed 17 Apr 2018.  
51  
52  
53  
54  
55  
56  
57  
58  
59  
60

- 1  
2  
3 445 14. Martin-Latry K, Bégaud B. Pharmacoepidemiological research using French reimbursement  
4  
5 446 databases: yes we can! *Pharmacoepidemiol Drug Saf.* 2010;19:256–65.  
6  
7  
8  
9 447 15. Moracchini C, Orleans V, Miloudi S, Frauger E, Micallef J, Thirion X, et al. [General Practitioners'  
10  
11 448 Contribution to Dependence Assessment: the OPEMA Programme]. *Thérapie.* 2012;67:397–404.  
12  
13  
14 449 16. Accueil | SNDS. <https://www.snds.gouv.fr/SNDS/Accueil>. Accessed 28 Jun 2018.  
15  
16  
17 450 17. ameli.fr - Sniiram. <https://www.ameli.fr/l-assurance-maladie/statistiques-et->  
18  
19 451 [publications/sniiram/finalites-du-sniiram.php](https://www.ameli.fr/l-assurance-maladie/statistiques-et-publications/sniiram/finalites-du-sniiram.php). Accessed 28 Jun 2018.  
20  
21  
22  
23 452 18. The European Network of Centres for Pharmacoepidemiology and Pharmacovigilance (ENCePP).  
24  
25 453 Guide on Methodological Standards in Pharmacoepidemiology (Revision 5) EMA/95098. 2010.  
26  
27 454 [http://www.encepp.eu/standards\\_and\\_guidances/](http://www.encepp.eu/standards_and_guidances/). Accessed 17 Apr 2018.  
28  
29  
30  
31 455 19. Sattler ELP, Lee JS, Perri M. Medication (re)fill adherence measures derived from pharmacy claims  
32  
33 456 data in older Americans: a review of the literature. *Drugs Aging.* 2013;30:383–99.  
34  
35  
36 457 **AUTHOR STATEMENT**  
37  
38 458 MG contributed to the questionnaires development and wrote the first draft of the manuscript.  
39  
40  
41 459 MR wrote the first draft of the protocol, contributed to the questionnaires development and to the  
42  
43 460 manuscript redaction.  
44  
45  
46  
47 461 PC designed statistical analysis of the SNDS database and contributed to the manuscript redaction.  
48  
49  
50 462 MGB provided her expertise in the area of addictology. She contributed to the preparation of the  
51  
52 463 zolpidem problematic consumers' questionnaire and validated their relevance to evaluate problematic  
53  
54 464 use.  
55  
56  
57  
58  
59  
60

1  
2  
3 465 PL contributed to the questionnaires development.  
4  
5

6 466 PJ validated the final draft of the protocol and the manuscript.  
7

8 467 CVV is responsible for the project management. She designed the study and finalized the protocol.  
9

10 468 All authors read and approved the final manuscript.  
11  
12  
13

14 469

15  
16 470 **FUNDING STATEMENT**  
17

18 471 This work was supported by ANSM grant number AAP-2017-027  
19

20 472 **COMPETING INTERESTS**  
21

22 473 The authors declare that they have no competing interests. For this project, the University Hospital of  
23

24 474 Nantes has received funding only from the ANSM.  
25  
26  
27

28 475 **ACKNOWLEDGEMENTS**  
29

30 476 We would like to thank, in addition to the authors, all who have worked on this project in order to make  
31

32 477 it possible : Marie-Lyne Pinot for her help in the elaboration of the call to tender, Léa Ferrand for her  
33

34 478 work with the regulatory bodies, all the CEIP-A for their valuable participation in the recruitment of  
35

36 479 practitioners as well as the specialized care centers dedicated to drug dependence of their respective  
37

38 480 regions. We would also like to thank the ANSM for the financial support they provided so that this  
39

40 481 research project may be completed, and the Nantes University Hospital for the payment of publication  
41

42 482 charges of this manuscript.  
43  
44

45 483 **WORD COUNT**  
46

47 484 4258  
48  
49

50 485  
51  
52  
53  
54  
55  
56



1  
2  
3  
4  
5  
6  
7  
8  
9  
10  
11  
12  
13  
14  
15  
16  
17  
18  
19  
20  
21  
22  
23  
24  
25  
26  
27  
28  
29  
30  
31  
32  
33  
34  
35  
36  
37  
38  
39  
40  
41  
42  
43  
44  
45  
46  
47  
48  
49  
50  
51  
52  
53  
54  
55  
56  
57  
58  
59  
60

Figure 1: Periods of study of the SNDS data base

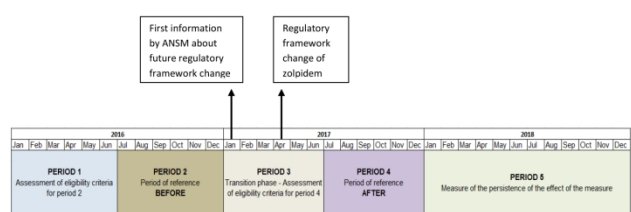

ANSM: French National Agency for Medicines and Health Products Safety.

Periods of study of the SNDS database

825x583mm (72 x 72 DPI)

# BMJ Open

## ZORRO study Protocol – French national health insurance database analysis and field study focusing on the impact of secure prescription pads on zolpidem consumption and sedative drug misuse.

|                                 |                                                                                                                                                                                                                                                                                                                                                                                                                                                                                                                                                                                                                                                                                                                                                                                                                                                                                                                                                                                                                                |
|---------------------------------|--------------------------------------------------------------------------------------------------------------------------------------------------------------------------------------------------------------------------------------------------------------------------------------------------------------------------------------------------------------------------------------------------------------------------------------------------------------------------------------------------------------------------------------------------------------------------------------------------------------------------------------------------------------------------------------------------------------------------------------------------------------------------------------------------------------------------------------------------------------------------------------------------------------------------------------------------------------------------------------------------------------------------------|
| Journal:                        | <i>BMJ Open</i>                                                                                                                                                                                                                                                                                                                                                                                                                                                                                                                                                                                                                                                                                                                                                                                                                                                                                                                                                                                                                |
| Manuscript ID                   | bmjopen-2018-027443.R1                                                                                                                                                                                                                                                                                                                                                                                                                                                                                                                                                                                                                                                                                                                                                                                                                                                                                                                                                                                                         |
| Article Type:                   | Protocol                                                                                                                                                                                                                                                                                                                                                                                                                                                                                                                                                                                                                                                                                                                                                                                                                                                                                                                                                                                                                       |
| Date Submitted by the Author:   | 19-Mar-2019                                                                                                                                                                                                                                                                                                                                                                                                                                                                                                                                                                                                                                                                                                                                                                                                                                                                                                                                                                                                                    |
| Complete List of Authors:       | Gerardin, Marie; University hospital of Nantes, Department of Clinical Pharmacology<br>Rousselet, Morgane; University hospital of Nantes, Department of Clinical Pharmacology; INSERM , U1246 SPHERE "methodS in Patient-centered outcomes and HEalth ResEarch"<br>Caillet, Pascal; University hospital of Nantes, Department of Clinical Pharmacology<br>Grall-Bronnec, Marie; University Hospital of Nantes, Clinical Investigation Unit BALANCED "BehaviorAL AddictioNs and ComplEx mood Disorders"; INSERM , U1246 SPHERE "methodS in Patient-centered outcomes and HEalth ResEarch"<br>Loue, Pierre; University Hospital of Rouen, Departement of General medicine<br>Jolliet, Pascale; University hospital of Nantes, Department of Clinical Pharmacology; INSERM , U1246 SPHERE "methodS in Patient-centered outcomes and HEalth ResEarch"<br>Victorri-Vigneau, C; University Hospital of Nantes, Department of Clinical Pharmacology; INSERM , U1246 SPHERE "methodS in Patient-centered outcomes and HEalth ResEarch" |
| <b>Primary Subject Heading</b>: | Pharmacology and therapeutics                                                                                                                                                                                                                                                                                                                                                                                                                                                                                                                                                                                                                                                                                                                                                                                                                                                                                                                                                                                                  |
| Secondary Subject Heading:      | Addiction                                                                                                                                                                                                                                                                                                                                                                                                                                                                                                                                                                                                                                                                                                                                                                                                                                                                                                                                                                                                                      |
| Keywords:                       | zolpidem, secured prescription, change in law, impact, addictovigilance, Substance misuse < PSYCHIATRY                                                                                                                                                                                                                                                                                                                                                                                                                                                                                                                                                                                                                                                                                                                                                                                                                                                                                                                         |
|                                 |                                                                                                                                                                                                                                                                                                                                                                                                                                                                                                                                                                                                                                                                                                                                                                                                                                                                                                                                                                                                                                |

SCHOLARONE™  
Manuscripts

1  
2  
3 **Title:** ZORRO study Protocol – French national health insurance database analysis and field study  
4  
5 focusing on the impact of secure prescription pads on zolpidem consumption and sedative drug  
6  
7 misuse.  
8  
9

10  
11  
12 **Authors:**  
13

14 Marie GERARDIN, Clinical Pharmacology Department, Nantes University Hospital, Nantes,  
15 France, 9 quai Moncousu, 44 093 Nantes cedex 1, France. [marie.gerardin@chu-nantes.fr](mailto:marie.gerardin@chu-nantes.fr)  
16  
17

18 Morgane ROUSSELET, Clinical Pharmacology Department, Nantes University Hospital, Nantes,  
19 France, 9 quai Moncousu, 44 093 Nantes cedex 1, France. Addictology and Psychiatry Department,  
20 Nantes University Hospital, 85 rue de Saint-Jacques, 44093 Nantes cedex 1, France. INSERM U1246  
21 SPHERE “methodS in Patient-centered outcomes and HHealth ResEarch”, Nantes and Tours University,  
22 22 boulevard Benoni Goullin, 44 000 Nantes, France. [morgane.rousselet@chu-nantes.fr](mailto:morgane.rousselet@chu-nantes.fr)  
23  
24  
25

26 Pascal CAILLET, Clinical Pharmacology Department, Nantes University Hospital, Nantes,  
27 France, 9 quai Moncousu, 44 093 Nantes cedex 1, France. [pascal.caillet@chu-nantes.fr](mailto:pascal.caillet@chu-nantes.fr)  
28  
29

30 Marie GRALL-BRONNEC, Addictology and Psychiatry Department, Nantes University Hospital,  
31 85 rue de Saint-Jacques, 44093 Nantes cedex 1, France. INSERM U1246 SPHERE “methodS in Patient-  
32 centered outcomes and HHealth ResEarch”, Nantes and Tours University, 22 boulevard Benoni Goullin,  
33 44 000 Nantes, France. [marie.bronnec@chu-nantes.fr](mailto:marie.bronnec@chu-nantes.fr)  
34  
35  
36

37 Pierre LOUE, General medical Department, Rouen faculty of medicine, Rouen University  
38 Hospital. [peterloue@me.com](mailto:peterloue@me.com)  
39  
40

41 Pascale JOLLIET, Clinical Pharmacology Department, Nantes University Hospital, Nantes,  
42 France, 9 quai Moncousu, 44 093 Nantes cedex 1, France. INSERM U1246 SPHERE “methodS in  
43 Patient-centered outcomes and HHealth ResEarch”, Nantes and Tours University, 22 boulevard Benoni  
44 Goullin, 44 000 Nantes, France. [pascale.jolliet@univ-nantes.fr](mailto:pascale.jolliet@univ-nantes.fr)  
45  
46  
47

48 Caroline VICTORRI-VIGNEAU, Clinical Pharmacology Department, Nantes University Hospital,  
49 Nantes, France, 9 quai Moncousu, 44 093 Nantes cedex 1, France. INSERM U1246 SPHERE “methodS  
50  
51  
52

1  
2  
3 in Patient-centered outcomes and HHealth ResEarch”, Nantes and Tours University, 22 boulevard  
4  
5 Benoni Goullin, 44 000 Nantes, France. [caroline.vigneau@chu-nantes.fr](mailto:caroline.vigneau@chu-nantes.fr)  
6  
7

8 **Corresponding author:**

9  
10 Caroline VICTORRI-VIGNEAU

11  
12 Adress: Clinical Pharmacology Department, Nantes University Hospital, Nantes, France,

13  
14 9 quai Moncouso, 44 093 Nantes cedex 1, France

15  
16 Phone : +33240084073

17  
18 E-Mail : [caroline.vigneau@chu-nantes.fr](mailto:caroline.vigneau@chu-nantes.fr)  
19  
20  
21  
22  
23  
24  
25  
26  
27  
28  
29  
30  
31  
32  
33  
34  
35  
36  
37  
38  
39  
40  
41  
42  
43  
44  
45  
46  
47  
48  
49  
50  
51  
52  
53  
54  
55  
56  
57  
58  
59  
60

## ABSTRACT

### Introduction

In recent years, data collected by the French Addictovigilance Network (FAN) has shown the potential for abuse and addiction associated with zolpidem (the most sold hypnotic drug in France). Since the 10<sup>th</sup> of April 2017, new regulations have come into force that require zolpidem to be prescribed on special secure prescription pads, in order to reduce the risk of abuse or misuse. This measure has far-reaching repercussions that are not only limited to the consumption of zolpidem but also extend to the usage of sedative medication on a whole.

The objective of the ZORRO study (ZOlpidem and the Reinforcement of the Regulation of prescription Orders) is to evaluate the overall impact of the new regulatory framework requiring zolpidem to be prescribed on special secure prescription pads. Three axes will be evaluated: the number of consumers, the type of consumption (chronic use versus occasional use, problematic consumption versus non-problematic use), and the consumption of other sedative molecules.

### Methods and analysis

The ZORRO study is an epidemiological, observational, national multi-center, non-controlled, prospective research project supported by the French National Agency for Medicines and Health Products Safety (ANSM). The evaluation of the impact of the regulatory framework change relative to zolpidem will be done according to two axes: via an epidemiological study of the French National Health Insurance database and by the implementation of field studies of prescribers and consumers of zolpidem.

### Ethics and dissemination

The local Research Ethics Committee (GNEDS) approved this study on 3 March 2018. Results will be presented in national and international conferences and submitted to peer-reviewed journals.

**Trial registration number** NCT03584542

### Keywords

Zolpidem, secured prescription, change in law, impact, addictovigilance, misuse.

## ARTICLE SUMMARY

### Strengths and limitations of the study

This study will contribute to setting up an innovative impact measure in order to evaluate the efficacy of institutions' response to the issue of zolpidem misuse and dependence.

The study will be representative of the French population by use of the French healthcare database SNDS, with a focus on how physicians and problematic consumers have coped with the change in law by use of complementary field studies.

Owing to technical constraints inherent to medico-administrative database use, the use of drugs that are not reimbursed is not be observable in the SNDS database, as well as clinical data that is not routinely gathered.

A lack of representativity may occur during participants' recruitment regarding the part of the project involving field sampling.

## INTRODUCTION

In recent years, zolpidem has been the best-selling hypnotic drug in France. Worldwide, a number of cases of misuse of zolpidem have been described (in Europe and in the United-States [1, 2]). The World Health Organisation (WHO) believes that the frequency of cases of abuse or addiction to zolpidem is similar to that associated with hypnotic benzodiazepines [3]. As a result, Zolpidem has been the target of a number of regulatory framework changes in both French national and international spheres. In particular, the United Nations has placed zolpidem in table IV of the Vienna convention which aims to control the abuse and trafficking of psychotropic substances (ruling of July 15<sup>th</sup> 2002)

In France, the French Addictovigilance network (FAN), piloted by the French National Agency for Medicines and Health Products Safety (Agence Nationale de Sécurité du Médicament et des Produits de Santé; ANSM) is in charge of the surveillance of cases of abuse and addiction associated with any drug or substance with a psychoactive effect. The surveillance is based on a network of 13 Centres for evaluation of and information on drug dependence and addiction monitoring (Centres d'Evaluation et d'Information sur la Pharmacodépendance-Addictovigilance; CEIP-A), who evaluate the addictive potential of a given drug via notifications provided by health professionals [4], and via specifically-developed pharmaco-epidemiology tools [5, 6].

Some controlled medicines and psychotropic substances (including zolpidem) are under reinforced surveillance by the ANSM as they are associated with a risk of misuse and addiction. In France, zolpidem is enlisted on the list I of harmful substances, that is to say, it is considered as a substance associated with a health risk. An initial national survey of the addictovigilance network in 2002 found serious and worrying cases of abuse and addiction to zolpidem. The 2002 survey revealed the existence of two consumer groups: a population of chronic high dosage consumers with a therapeutic usage of zolpidem, and a population of "misusers" in search of an effect other than hypnotic (euphoria, wellbeing or stimulant effect). The same survey also found, via the analysis of the FAN pharmaco-epidemiology tools, that zolpidem is a substance prone to abuse [7]. Following to

1  
2  
3 this conclusion, the Summary of Product Characteristics (SPC) of zolpidem was modified, with  
4 notably the addition of a warning with respect to addiction. In June 2011, an update of data relative  
5 to the addictive potential of zolpidem found the same two consumer groups as in the 2002 survey  
6 with cases of increasing severity associated with the consumption of particularly high dosages [8]. In  
7 light of these results, the prescription of zolpidem on special secure prescription pads was put  
8 forward by the National Commission of Narcotics and Psychotropic Substances (Commission  
9 Nationale des Stupéfiants et Psychotropes; CNSP). In 2012, the FAN tools all, once again, proclaim  
10 zolpidem as a problematic substance.

11  
12 The surveillance tools of the FAN allow for the identification of the problem of addiction in specific  
13 population groups, but they do not provide a general population risk profile. However, the analysis of  
14 quantitative data, in the French National Health Insurance database, relative to the usage of  
15 zolpidem and zopiclone in the general population [9], provided the identification of a number of  
16 different clinical profiles of zolpidem consumers: (i) « non-problematic » consumers, the largest  
17 group; (ii) individuals who could have developed a tolerance to the hypnotic effects of zolpidem, for  
18 whom the prescription of alternative hypnotic/anxiolytic medication is justified; (iii) potential  
19 problematic consumers of zolpidem (1%) (high rate of fraudulent behavior, excessive usage, non-  
20 respect of guidelines and medical-pharmaceutical nomadism). In 2017, another research program  
21 gave insight into the characteristics of the two aforementioned consumer groups via the analysis of  
22 reports from health professionals [10].

23  
24 Following to these results, on the 11<sup>th</sup> of January 2017, the ANSM decreed that as from April the 10<sup>th</sup>  
25 2017, the prescription of zolpidem was to be done on secure prescription pads [11]. The ANSM  
26 stated that « this measure is taken in order to limit the risk of abuse and misuse » and « to  
27 encourage correct usage ». In a country where the consumption of psychotropic drugs is high, a  
28 ruling that impacts the most sold hypnotic drug [12, 13] will disrupt not only its' usage but also on a  
29 larger scale the overall prescription of sedative substances (hypnotics and anxiolytics). The current  
30 project aims to develop a means to measure the impact of this new ruling, in the scope of works of  
31  
32  
33  
34  
35  
36  
37  
38  
39  
40  
41  
42  
43  
44  
45  
46  
47  
48  
49  
50  
51  
52  
53  
54  
55  
56  
57  
58  
59  
60



1  
2  
3 the ANSM, that is to say, in terms of the reduction of the risk of abuse, the improvement of correct  
4 use of zolpidem and the change in prescriptions of sedative molecules. This project forms part of the  
5 evaluation of zolpidem done by the Nantes CEIP-A, the organization in charge of its follow up. In  
6 addition to the tools used by the FAN [5], this project will allow for a longitudinal evaluation of the  
7 trajectories of different patients, as well as providing insight into the general population.  
8  
9  
10  
11  
12  
13  
14  
15

## 16 **METHODS AND ANALYSIS**

### 17 **Aim**

18  
19 The objective of the ZORRO study (ZOlpidem and the Reinforcement of the Regulation of prescription  
20 Orders) is to evaluate the overall impact of the obligation to use secure prescription pads for  
21 zolpidem. We propose a multimodal approach that will provide valuable insight into three key  
22 questions: 1) what is the impact of this measure on the number of consumers? 2) What is the impact  
23 of this measure on the type of consumption? 3) What is the impact of this measure on the  
24 consumption of other sedative molecules?  
25  
26  
27  
28  
29  
30  
31  
32  
33

### 34 **Study design**

35  
36 This scientific project is based on a multimodal epidemiological approach, which combines a  
37 retrospective cohort study and a transversal field study. The cohort study draws from the French  
38 National Health Information database (Système National des Données de Santé; SNDS, formerly  
39 known as the French National Inter-schemes Health Insurance database (Système National  
40 d'Information Inter-Régimes de l'Assurance Maladie; SNIIRAM)) [14]. The transversal field study  
41 involves the gathering in-field of clinical data of different populations: general practitioners that  
42 prescribe zolpidem as well as consumers (both patients having consulted a general practitioner and  
43 those having recourse to specialized care centers dedicated to drug dependence). To our knowledge,  
44 a study of this amplitude does not exist in France.  
45  
46  
47  
48  
49  
50  
51  
52  
53  
54

55  
56 These two approaches will provide insight into three key areas:  
57  
58  
59  
60

- 1  
2  
3 - To evaluate the impact of the measure on the number of consumers, we will estimate via the  
4 SNDS database the prevalence and the incidence of zolpidem consumers in the general  
5 population before and after the regulatory framework change.  
6  
7  
8  
9  
10 - To evaluate the impact of the measure on the type of consumption, we will explore the  
11 changes in the modes of consumption: occasional use *versus* chronic use and problematic  
12 use *versus* non-problematic use. Problematic use is defined as consumption outside of the  
13 SPC guidelines for at least one of the following parameters: the duration of consumption, the  
14 dosage, the means of procurement, the routes of administration or the search for an effect  
15 other than hypnotic. This evaluation will be done both from SNDS database for the  
16 evaluation of the general population and from the field studies for the evaluation of  
17 problematic consumers of zolpidem (patients of general practitioners and users of  
18 specialized care centers dedicated to drug dependence).  
19  
20  
21  
22  
23  
24  
25  
26  
27  
28  
29  
30 - To evaluate the impact of the measure on the consumption of other sedative molecules, we  
31 will analyze the reporting of prescriptions and the changes observed both in the general  
32 population in the SNDS database as well as among prescribers and problematic consumers of  
33 zolpidem (patients of general practitioners and users of drug-user risk reduction centers or  
34 specialized care centers dedicated to drug dependence).  
35  
36  
37  
38  
39  
40

### 41 **Setting of the study**

42  
43 The Nantes CEIP-A, is the national investigating center in charge of the management, surveillance  
44 and coordination of the entire project. General practitioners, their patients and users of zolpidem  
45 will be recruited across France. Recruitment as well as the gathering and the analysis of data (SNDS  
46 database and field studies) will be done by the Nantes CEIP-A.  
47  
48  
49

50  
51  
52 A multi-disciplinary pilot committee, comprised of pharmacologists, general practitioners, a  
53 methodologist bio-statistician, a clinical study technician and of an addictologist psychiatrist, has  
54 been constituted in order to define the research protocol and in order to insure the scientific and  
55 methodological validity of the study.  
56  
57  
58  
59  
60

## Patient and public involvement

Patients were not involved in the design of the study.

## Populations

### *Analysis of the SNDS database*

The study sample will include all patients in the database during the period from the 1<sup>st</sup> of January 2016 to the 31<sup>st</sup> of December 2018. The target population of our research will be constituted of consumers of zolpidem included in the SNDS database between the 1<sup>st</sup> of January 2016 and the 31<sup>st</sup> of December 2018.

### *Field study among General practitioners*

Practitioners, situated within the national borders, will be randomly selected from the list of the National Health Insurance for Wage laborers (Caisse Nationale de l'Assurance Maladie des Travailleurs Salariés; CNAMTS). Practitioners specialized in the care of addictions and used to working with the FAN, will also be solicited [15]. Practitioners with an independent practice at the time of change in regulatory framework and who agree to participate, via oral consent, will be included.

### *Field study among problematic consumers of zolpidem (patients of general practitioners and users of specialized care centers dedicated to drug dependence)*

Participating practitioners will select patients who presented a problematic use of zolpidem before the coming into force of the new regulatory framework. Patients will be included in the study if they provide their oral consent to participate. Participating practitioners will give them a questionnaire to complete in the waiting room and return in a sealed envelope. Participating specialized care centers

1  
2  
3 dedicated to drug dependence (Centre de Soins, d'Accompagnement et de Prévention en  
4 Addictologie; CSAPA) and drug-user risk reduction centers (Centre d'Accueil et d'Accompagnement à  
5 la Réduction des risques pour Usagers de Drogues; CAARUD) will select users who presented a  
6  
7 problematic use of zolpidem before the coming into force of the new regulatory framework. Users  
8  
9 will be included in the study if they provide their oral consent to participate. The facility staff will  
10  
11 provide them with a questionnaire to complete. A problematic consumption of zolpidem is defined  
12  
13 according to the Diagnostic and Statistical Manual of Mental Disorders 5<sup>th</sup> edition (DSM-5) criteria of  
14  
15 Substance Use Disorder. Under aged or protected individuals as well as subjects with French  
16  
17 language difficulties (understanding, reading or writing) incompatible with the filling out of a  
18  
19 questionnaire, will not be included in the study.  
20  
21  
22  
23  
24  
25  
26

## 27 **Materials**

### 28 *Analysis of the SNDS database*

29  
30  
31 The SNDS database is described in detail in the publication by Bezin *et al* [14] as well as on related  
32  
33 internet sites [16, 17]. The SNDS links several existing databases: the SNIIRAM, the nationwide claims  
34  
35 database of the French National Healthcare system; the national hospital database (Programme de  
36  
37 Médicalisation des Systèmes d'Information; PMSI) and the national death registry (Centre  
38  
39 d'épidémiologie sur les causes médicales de Décès; CepiDC). The SNDS covers more than 98% of the  
40  
41 French population (66 million people) from birth (or immigration) to death (or emigration), even in  
42  
43 case of change in occupation or retirement. Data is individual and anonymous. The SNDS contains a  
44  
45 longitudinal record of health encounters, hospital diagnoses and drugs deliveries relative to  
46  
47 outpatient medical care claims, including all reimbursed drugs, information from hospital discharge  
48  
49 summaries, and date of death.  
50  
51  
52  
53  
54  
55  
56  
57

### 58 *Field study among general practitioners*

1  
2  
3 Participating general practitioners will reply to short telephone questionnaire, which will gather  
4  
5 information on their perceptions and their prescription strategy following to the new regulatory  
6  
7 framework (continuation of zolpidem on a secure prescription pad, prescription of a different  
8  
9 sedative drug, cease in hypnotic prescriptions). The criteria for their choices will also be explored.  
10  
11  
12

#### 13 14 *Field study among problematic consumers of zolpidem (patients and users)*

15  
16 Patients and users will fill out a two-part auto-questionnaire. The first part will evaluate the  
17  
18 consumption of zolpidem before the coming into force of the new regulatory framework (dosages  
19  
20 used, duration, pursued effects and effects felt) and their change or not after the coming into force  
21  
22 of the new regulatory framework (cease, change in dosage, relay to another drug or sedative  
23  
24 substance). The second part of the questionnaire will be filled out only by patients or users for whom  
25  
26 a change is observed and it will gather information pertaining to the favored replacement substance  
27  
28 (dosages used, duration, pursued effects and effects felt). General practitioners and staff of the  
29  
30 CSAPA and CCARUD will return the completed questionnaires to the CEIP-A in Nantes for analysis.  
31  
32  
33  
34  
35

#### 36 **Study size**

##### 37 38 39 40 *Analysis of the SNDS database:*

41  
42 In light of the retrospective nature of the study and of the databases used, the calculation of a power  
43  
44 is not necessary, in accordance with the good practice guidelines of the European Network of  
45  
46 Centers for Pharmaco-epidemiology and Pharmacovigilance [18].  
47  
48  
49  
50

##### 51 52 *Field studies among prescribing general practitioners and problematic consumers of zolpidem:*

53  
54 Three hundred practitioners will be selected in order to insure that at least one hundred  
55  
56 practitioners participate in the recruitment of problematic consumers of zolpidem. For feasibility  
57  
58 reasons, the number of general practitioner patients to be included depends upon the construction  
59  
60

1  
2  
3 of a convenience sample. This sample is estimated to be about 200 patients. Furthermore, 200 users  
4  
5 will be recruited via the specialized care centers dedicated to drug dependence.  
6  
7  
8  
9

### 10 **Statistical methods**

11 All variables will undergo a descriptive analysis. Quantitative variables will be described using usual  
12 position (mean or median) and dispersion (standard deviation, interquartile range) parameters. The  
13 normality of their distribution will be assessed numerically (normality test) and graphically. For  
14 normally distributed quantitative variables, mean and standard deviation will be used. For non-  
15 normally distributed variables, median and interquartile ranges will be used. Qualitative variables will  
16 be described using number and frequency tables for each parameter. All analysis will be conducted  
17 with SAS software. Specific statistical methods will be implemented in order to answer each question  
18 adequately.  
19  
20  
21  
22  
23  
24  
25  
26  
27  
28  
29  
30  
31

32 *Impact of the measure on the number of consumers: estimation of prevalence and incidence of*  
33 *zolpidem users within the SNDS database before and after the regulatory framework change*  
34  
35  
36

37 A number of periods will be studied (figure 1). The proportion of patients having received at least  
38 one delivery of zolpidem during the period 2 and during the period 4 will be compared using a Mc  
39 Nemar test for paired proportion. Patients missing from one of the two periods will be recorded as  
40 non-users. The significance threshold will be fixed at 5%. An incident user will be defined as a patient  
41 receiving a first delivery of zolpidem without any prior delivery over the preceding 6 months. The  
42 number of incident users within each period will be compared using a Poisson model. The  
43 significance threshold for each coefficient will be fixed at 5%.  
44  
45  
46  
47  
48  
49  
50  
51  
52  
53  
54

55 *Impact on the type of consumption regarding changes in treatment duration*  
56

57 *Within the SNDS database:* The length of the first treatment episode will be evaluated by  
58 calculating the number of days covered by the initial delivery (theoretical length of treatment). The  
59  
60

1  
2  
3 predicted variable will be the duration of treatment over a threshold (yes/no). The period will be  
4 entered as a covariate in the model, enabling the study of the effect of the period on the probability  
5 of the treatment being chronic while taking into account the correlation of treatment characteristics  
6 for a given patient.  
7  
8  
9  
10

11 *Within the field study among problematic consumers of zolpidem:* A descriptive analysis will  
12 be performed, with the characterization of the duration of treatment with zolpidem before the  
13 regulatory framework change and of the duration of treatment with zolpidem or of the replacement  
14 drug/substance after the regulatory framework change.  
15  
16  
17  
18  
19

20  
21  
22  
23 *Impact on the type of consumption addressing changes in the type of consumption, problematic or*  
24 *non-problematic*  
25  
26

27 *Within the SNDS database:* A latent class analysis (LCA) will be conducted within each period,  
28 including the following variables: age, sex, presence of a chronic disease, poor economic status,  
29 prescribing practitioners specialty (only whether or not a general practitioner), number of different  
30 prescribing practitioners (doctor shopping), number of dispensing pharmacies (pharmacy shopping),  
31 excess use (mean monthly medication possession ratio [19] (MPR) > 1 during the period), adherence  
32 to French good practice guidelines regarding hypnotics (encompassing the absence of association  
33 with others benzodiazepines), presence of an associated psychiatric disorder (identified by  
34 concomitant drug use, i.e opioids substitution treatments, psycholeptic and psychoanaleptic drugs).  
35 The analysis will be repeated during periods 2 and 4. In order to study the transitions between  
36 clusters over time, a latent transition analysis (LTA) will be performed. The choice of the best model  
37 will be made considering Bayesian Information Criterion (BIC). The choice of the best model will also  
38 be made with consideration to the stability of the model (proportion of convergences among the  
39 5000 iterations), the BIC (lower is better) and the interpretability of the model.  
40  
41  
42  
43  
44  
45  
46  
47  
48  
49  
50  
51  
52  
53  
54  
55  
56  
57  
58  
59  
60

1  
2  
3           *Within the field observational study among problematic consumers of zolpidem: A descriptive*  
4 analysis will be performed. We will compare the number and the distribution of the positive criteria  
5 of problematic consumers (patients et users) before (for zolpidem treatment) and after the coming  
6 into force of the new regulatory framework (for zolpidem treatment or replacement substances):  
7 duration of consumption, dosage, manner in which zolpidem or other substance is obtained, route of  
8 administration or pursued effects different from the expected effect of the treatment or substance.  
9 Parametric or non-parametric paired-tests will be used for comparisons, according to the  
10 distributions of each variable. For each hypothesis test, an alpha risk of 5% will be used. In case of  
11 multiple testing, a correction of the significance threshold will be applied to avoid alpha risk inflation  
12 (Hochberg's method).  
13  
14  
15  
16  
17  
18  
19  
20  
21  
22  
23  
24  
25  
26  
27

28           *Impact on the consumption of other sedative molecules: analysis of prescription deferrals and*  
29 switches  
30  
31

32           *Within the SNDS database, regarding characterization of consumption trajectories:*

33 Firstly, a time series analysis will be performed on aggregated monthly data (proportion of users per  
34 month) to compare the changes in the consumption of zolpidem and other sedatives across all the  
35 study periods. Cross-correlation between the different time series will be studied in order to identify  
36 if zolpidem users have shifted their consumption to other drugs since the change in regulatory  
37 framework. Secondly, a sequence analysis will be performed using dedicated tools (TramineR,  
38 SeqHMM and arulesSequences packages in R software). This will include a cluster analysis of the  
39 sequences, in order to identify typical trajectories in consumption and their modification following to  
40 the change in the regulatory framework.  
41  
42  
43  
44  
45  
46  
47  
48  
49  
50  
51

52           *Within the field study among physicians: A descriptive analysis of changes in prescription*  
53 behaviour and motives for change will be performed.  
54  
55

56           *Within the field study among problematic consumers of zolpidem: A descriptive analysis of*  
57 the number of molecules tried as a replacement and the molecules that best replaced zolpidem, if  
58  
59  
60



1  
2  
3 applicable, after the change in regulatory framework, will be performed. In patients stopping  
4 zolpidem, but switching to another molecule, a univariate analysis of the same variables will be  
5 conducted in order to describe the use of zolpidem before the coming into force of the new  
6 regulatory framework and the use of other sedative drugs used in place of zolpidem after the coming  
7 into force of the new regulatory framework. For each hypothesis test, an alpha risk of 5% will be  
8 used. In case of multiple testing, a correction of the significance threshold will be applied to avoid  
9 alpha risk inflation (Hochberg's method).  
10  
11  
12  
13  
14  
15  
16  
17  
18  
19  
20

## 21 **DISCUSSION**

22  
23  
24  
25 The evaluation of the addictive power of zolpidem by the addictovigilance network, required over  
26 the past, above and beyond the tools of the CEIP-A, the implementation of specific research  
27 programs. The evaluation of the impact of the change in the regulatory framework will similarly  
28 require the implementation of specific research programs. This project offers a design and a  
29 methodology which are complementary to the tools of the CEIP-A [4], indispensable to the  
30 measurement of the impact, that we believe to be major, of a change in the prescription  
31 requirements of the most sold hypnotic in France. The ZORRO project aims to develop a method to  
32 measure the impact of the change in regulatory framework on practitioners' prescriptions of  
33 sedative molecules. This evaluation is complex, as in order to be thorough it must precisely measure  
34 the different aspects of the consequences of the regulatory framework change, both from a  
35 quantitative and qualitative point of view. Rather than doing a single study, we prefer to employ a  
36 strategy based on a number of different, and complementary, methodological approaches. We have  
37 anticipated some possible bias: for the analysis of information from a database, we chose the data  
38 from the SNDS database as it contains information close to that of the real consumption. In the  
39 absence of available data on the drugs actually taken by patients, this database provides information  
40 on the drugs that patients obtain from pharmacies, which is more accurate than sales data for  
41  
42  
43  
44  
45  
46  
47  
48  
49  
50  
51  
52  
53  
54  
55  
56  
57  
58  
59  
60

1  
2  
3 example. Concerning the periods of reference before and after, we have voluntarily chosen periods  
4  
5 distant from the times of announcement and the coming into force of the change in regulatory  
6  
7 framework in order to minimize bias linked to the transition period. Although the regulatory  
8  
9 framework change came into force in April 2017, the ANSM had published information on the  
10  
11 measure as from January 2017. A part of the practitioners prescribing zolpidem therefore anticipated  
12  
13 the change in the regulatory framework and started to change their prescription strategy as from  
14  
15 January 2017. One of the limits of the SNDS database, that justifies our multimodal approach, is the  
16  
17 complete absence of clinical information concerning the effects pursued or felt by patients, as well as  
18  
19 the modification in routes of administration. Concerning the in-field clinical study, the principal bias  
20  
21 is a memory bias of the questioned subjects. The time between the change in the regulatory  
22  
23 framework and the implementation of the study is however incompressible as it is necessary to give  
24  
25 patients and users sufficient hindsight in order to evaluate the changes in their consumption of  
26  
27 zolpidem. In fact, the questions have been formulated in a simplified manner, and our project targets  
28  
29 the most problematic consumers, who should remember with little difficulty the changes, having an  
30  
31 impact on their daily lives, following to the new regulatory framework. A possible declarative bias  
32  
33 does exist among patients and users, although this bias was taken into account, in order to minimize  
34  
35 it, in the conception of the questionnaire. On the one hand the questionnaire is completely  
36  
37 anonymous. On the other hand, for patients, the questionnaire is filled-in away from any medical  
38  
39 presence and handed back in a sealed envelope that is opened only by the Nantes CEIP-A for data  
40  
41 analysis. The CEIP-A personnel are accustomed to interviewing subjects recruited via specialized care  
42  
43 centers dedicated to drug dependence on their substance consumption, in the framework of their  
44  
45 mission of surveillance of addition and abuse of psychoactive substances. Our personnel have  
46  
47 therefore developed an expertise in the realization of projects of this type among the users of  
48  
49 specialized care centers dedicated to drug dependence. The strengths of this project lie within its'  
50  
51 multimodal approach. It allows, on the one hand, to document numerous possible consequences of  
52  
53 the regulatory framework change, and on the other hand, to insure the overall coherence of the  
54  
55  
56  
57  
58  
59  
60

1  
2  
3 different studies via the management by an expert team in the field, coordinated by the French  
4 national reference center on the addictive potential of zolpidem. This project may very well have a  
5 double impact: on the one hand, it will provide additional data essential to the ANSMs' mission of  
6 surveillance of the risk relative to overdose, abuse, addiction and misuse of sedative substances; on  
7 the other hand, this project could be the defining point of a series of steps (for example  
8 communication and information campaigns) designed to manage the public health issues  
9 surrounding zolpidem and to measure their overall impact.  
10  
11  
12  
13  
14  
15  
16  
17  
18  
19  
20

## 21 **ETHICS AND DISSEMINATION:**

### 22 **Ethics approval**

23  
24 The Committee for the Protection of the Population (CPP) approved the protocol on the 11/06/2018  
25 and the Committee of Expertise in Research, Studies and Evaluations in the Field of Health (CEREES)  
26 on the 12/04/2018. The National Commission of Information Technology and Liberties (CNIL) gave a  
27 favorable opinion.  
28  
29  
30  
31  
32

### 33 **Information to participants**

34 For the epidemiological analysis of the SNDS database: not applicable

35  
36 Practitioners: all practitioners will receive clear information regarding the study orally during the  
37 telephone interview. Practitioners that participate in the recruitment of patients will also receive  
38 written information.  
39  
40  
41  
42  
43

44 Patients and users: general practitioners and the study agents in the specialized care centers  
45 dedicated to drug dependence agree to inform all patients and users, in a clear and impartial  
46 manner, about the protocol. They will also provide written information.  
47  
48  
49  
50

### 51 **Consent to participate**

52 For the epidemiological analysis of the SNDS database: not applicable

53  
54 Practitioners: oral non-refusal to participate will be sought before delivery of the telephone  
55 questionnaire. Practitioners that accept to reply to the telephone questionnaire will be considered as  
56  
57  
58  
59  
60

1  
2  
3 not in opposition of the study. For the recruitment of patients, practitioners that fill in the  
4 documents relative to the inclusion of a patient will be considered as agreeing to participate in the  
5 study.  
6  
7  
8

9 Patients and users: oral non-refusal from patients and users will be sought. Subjects (patients or  
10 users) that fill out an auto questionnaire will be considered as agreeing to participate in the study.  
11  
12

### 13 **Consent for publication**

14  
15 The written information documents provided to practitioners, patients and users, state that the  
16 anonymous information gathered during the study is likely to be used in scientific publications and  
17 public communications.  
18  
19  
20  
21  
22

### 23 **Availability of data and material**

24  
25 Not applicable  
26

### 27 **Figure legends**

28  
29 Figure 1: Periods of study of the SNDS database  
30  
31  
32  
33  
34  
35  
36  
37  
38  
39  
40  
41  
42  
43  
44  
45  
46  
47  
48  
49  
50  
51  
52  
53  
54  
55  
56  
57  
58  
59  
60

**REFERENCES**

1. Hajak G, Müller WE, Wittchen HU, Pittrow D, Kirch W. Abuse and dependence potential for the non-benzodiazepine hypnotics zolpidem and zopiclone: a review of case reports and epidemiological data. *Addict Abingdon Engl*. 2003;98:1371–8.
2. Yen C-F, Yen C-N, Ko C-H, Hwang T-J, Chen C-S, Chen T-T, et al. Correlates of dependence and beliefs about the use of hypnotics among zolpidem and zopiclone users. *Subst Use Misuse*. 2015;50:350–7.
3. WHO Expert Committee on Drug Dependence : thirty-first report. 1999. <http://apps.who.int/iris/handle/10665/42285>. Accessed 17 Aug 2018.
4. Jouanjus E, Gibaja V, Kahn J-P, Haramburu F, Daveluy A. Signal identification in addictovigilance: the functioning of the French system. *Therapie*. 2015;70:113–31.
5. Micallef J, Jolliet P, Victorri-Vigneau C, Mallaret M, Richard N, Haramburu F, et al. [First meeting of the French CEIP (centres d'évaluation et d'information sur la pharmacodépendance). Assessment of the abuse and pharmacodependence potential during drug development]. *Therapie*. 2008;63:55–65.
6. Jouanjus E, Guernec G, Lapeyre-Mestre M, French Addictovigilance Network. Medical prescriptions falsified by the patients: a 12-year national monitoring to assess prescription drug diversion. *Fundam Clin Pharmacol*. 2018;32(3):306-322.
7. Victorri-Vigneau C, Dailly E, Veyrac G, Jolliet P. Evidence of zolpidem abuse and dependence: results of the French Centre for Evaluation and Information on Pharmacodependence (CEIP) network survey. *Br J Clin Pharmacol*. 2007;64:198–209.
8. Victorri-Vigneau C, Gérardin M, Rousselet M, Guerlais M, Grall-Bronnec M, Jolliet P. An update on zolpidem abuse and dependence. *J Addict Dis*. 2014;33:15–23.

- 1  
2  
3 9. Victorri-Vigneau C, Feuillet F, Wainstein L, Grall-Bronnec M, Pivette J, Chaslerie A, et al.  
4  
5 Pharmacoepidemiological characterisation of zolpidem and zopiclone usage. *Eur J Clin Pharmacol*.  
6  
7 2013;69:1965–72.  
8  
9  
10  
11 10. Rousselet M, Feuillet F, Gerardin M, Jolliet P, Hardouin J-B, Victorri-Vigneau C. The French  
12  
13 addictovigilance network clinical assessment: Z-drugs, true false twins. *Expert Opin Drug Saf*.  
14  
15 2017;16:1063–9.  
16  
17  
18 11. ANSM : Agence nationale de sécurité du médicament et des produits de santé. Prescription  
19  
20 obligatoire du zolpidem sur ordonnance sécurisée - Point d'Information. 2017.  
21  
22 [http://www.ansm.sante.fr/S-informer/Points-d-information-Points-d-information/Prescription-](http://www.ansm.sante.fr/S-informer/Points-d-information-Points-d-information/Prescription-obligatoire-du-zolpidem-sur-ordonnance-securisee-Point-d-Information)  
23  
24 [obligatoire-du-zolpidem-sur-ordonnance-securisee-Point-d-Information](http://www.ansm.sante.fr/S-informer/Points-d-information-Points-d-information/Prescription-obligatoire-du-zolpidem-sur-ordonnance-securisee-Point-d-Information). Accessed 17 Apr 2018.  
25  
26  
27  
28 12. ANSM : Agence nationale de sécurité du médicament et des produits de santé. Etat des lieux en  
29  
30 2013 de la consommation des benzodiazépines en France - Point d'Information. 2014.  
31  
32 [http://ansm.sante.fr/S-informer/Points-d-information-Points-d-information/Etat-des-lieux-en-2013-](http://ansm.sante.fr/S-informer/Points-d-information-Points-d-information/Etat-des-lieux-en-2013-de-la-consommation-des-benzodiazepines-en-France-Point-d-Information)  
33  
34 [de-la-consommation-des-benzodiazepines-en-France-Point-d-Information](http://ansm.sante.fr/S-informer/Points-d-information-Points-d-information/Etat-des-lieux-en-2013-de-la-consommation-des-benzodiazepines-en-France-Point-d-Information). Accessed 17 Apr 2018.  
35  
36  
37  
38 13. ANSM : Agence nationale de sécurité du médicament et des produits de santé. Etat des lieux de  
39  
40 la consommation des benzodiazépines - Point d'Information. 2017. [http://ansm.sante.fr/S-](http://ansm.sante.fr/S-informer/Points-d-information-Points-d-information/Etat-des-lieux-de-la-consommation-des-benzodiazepines-Point-d-Information)  
41  
42 [informer/Points-d-information-Points-d-information/Etat-des-lieux-de-la-consommation-des-](http://ansm.sante.fr/S-informer/Points-d-information-Points-d-information/Etat-des-lieux-de-la-consommation-des-benzodiazepines-Point-d-Information)  
43  
44 [benzodiazepines-Point-d-Information](http://ansm.sante.fr/S-informer/Points-d-information-Points-d-information/Etat-des-lieux-de-la-consommation-des-benzodiazepines-Point-d-Information). Accessed 17 Apr 2018.  
45  
46  
47  
48 14. J. Bezin, M. Duong, R. Lassalle, C. Droz, A. Pariente, P. Blin, et al. The national healthcare system  
49  
50 claims databases in France, SNIIRAM and EGB: powerful tools for pharmacoepidemiology.  
51  
52 *Pharmacoepidemiol. Drug Saf.*, 26 (8) (2017), pp. 954-962  
53  
54  
55  
56 15. Moracchini C, Orleans V, Miloudi S, Frauger E, Micallef J, Thirion X, et al. [General Practitioners'  
57  
58 Contribution to Dependence Assessment: the OPEMA Programme]. *Therapie*. 2012;67:397–404.  
59  
60

1  
2  
3 16. Accueil | SNDS. <https://www.snds.gouv.fr/SNDS/Accueil>. Accessed 28 Jun 2018.  
4  
5

6 17. ameli.fr - Sniiram. [https://www.ameli.fr/l-assurance-maladie/statistiques-et-](https://www.ameli.fr/l-assurance-maladie/statistiques-et-publications/sniiram/finalites-du-sniiram.php)  
7  
8 publications/sniiram/finalites-du-sniiram.php. Accessed 28 Jun 2018.  
9

10  
11 18. The European Network of Centres for Pharmacoepidemiology and Pharmacovigilance (ENCEPP).  
12 Guide on Methodological Standards in Pharmacoepidemiology (Revision 5) EMA/95098. 2010.  
13  
14 [http://www.encepp.eu/standards\\_and\\_guidances/](http://www.encepp.eu/standards_and_guidances/). Accessed 17 Apr 2018.  
15  
16  
17

18  
19 19. Sattler ELP, Lee JS, Perri M. Medication (re)fill adherence measures derived from pharmacy  
20 claims data in older Americans: a review of the literature. *Drugs Aging*. 2013;30:383–99.  
21  
22  
23

#### 24 25 **AUTHOR STATEMENT**

26 MG contributed to the questionnaires development and wrote the first draft of the manuscript.  
27  
28

29  
30 MR wrote the first draft of the protocol, contributed to the questionnaires development and to the  
31 manuscript redaction.  
32  
33

34  
35 PC designed statistical analysis of the SNDS database and contributed to the manuscript redaction.  
36  
37

38 MGB provided her expertise in the area of addictology. She contributed to the preparation of the  
39 zolpidem problematic consumers' questionnaire and validated their relevance to evaluate  
40 problematic use.  
41  
42  
43  
44

45  
46 PL contributed to the questionnaires development.  
47  
48

49 PJ validated the final draft of the protocol and the manuscript.  
50

51 CVV is responsible for the project management. She designed the study and finalized the protocol.  
52

53 All authors read and approved the final manuscript.  
54  
55

#### 56 57 58 **FUNDING STATEMENT** 59 60

1  
2  
3 This work was supported by ANSM grant number AAP-2017-027  
4

5 **COMPETING INTERESTS**  
6

7 The authors declare that they have no competing interests. For this project, the University Hospital  
8  
9 of Nantes has received funding only from the ANSM.  
10  
11

12 **ACKNOWLEDGEMENTS**  
13

14 We would like to thank, in addition to the authors, all who have worked on this project in order to  
15  
16 make it possible : Marie-Lyne Pinot for her help in the elaboration of the call to tender, Léa Ferrand  
17  
18 for her work with the regulatory bodies, all the CEIP-A for their valuable participation in the  
19  
20 recruitment of practitioners as well as the specialized care centers dedicated to drug dependence of  
21  
22 their respective regions. We would also like to thank the ANSM for the financial support they  
23  
24 provided so that this research project may be completed, and the Nantes University Hospital for the  
25  
26 payment of publication charges of this manuscript.  
27  
28  
29

30 **WORD COUNT**  
31

32 4209  
33  
34  
35  
36  
37  
38  
39  
40  
41  
42  
43  
44  
45  
46  
47  
48  
49  
50  
51  
52  
53  
54  
55  
56  
57  
58  
59  
60



**Figure 1: Periods of study of the SNDS database**

1  
2  
3  
4  
5  
6  
7  
8  
9  
10  
11  
12  
13  
14  
15

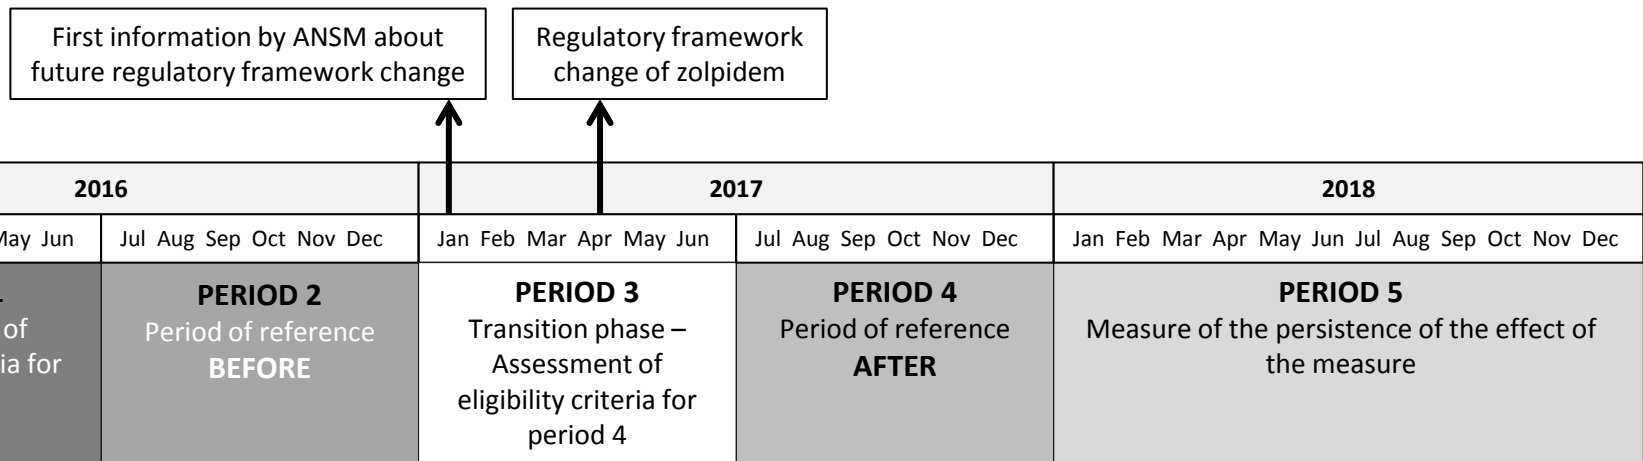

ANSM: French National Agency for Medicines and Health Products Safety

17  
18  
19  
20  
21  
22  
23  
24  
25  
26  
27  
28  
29  
30  
31  
32  
33  
34  
35  
36  
37  
38  
39  
40  
41

# BMJ Open

## ZORRO study Protocol – French national health insurance database analysis and field study focusing on the impact of secure prescription pads on zolpidem consumption and sedative drug misuse.

|                                 |                                                                                                                                                                                                                                                                                                                                                                                                                                                                                                                                                                                                                                                                                                                                                                                                                                                                                                                                                                                                                                |
|---------------------------------|--------------------------------------------------------------------------------------------------------------------------------------------------------------------------------------------------------------------------------------------------------------------------------------------------------------------------------------------------------------------------------------------------------------------------------------------------------------------------------------------------------------------------------------------------------------------------------------------------------------------------------------------------------------------------------------------------------------------------------------------------------------------------------------------------------------------------------------------------------------------------------------------------------------------------------------------------------------------------------------------------------------------------------|
| Journal:                        | <i>BMJ Open</i>                                                                                                                                                                                                                                                                                                                                                                                                                                                                                                                                                                                                                                                                                                                                                                                                                                                                                                                                                                                                                |
| Manuscript ID                   | bmjopen-2018-027443.R2                                                                                                                                                                                                                                                                                                                                                                                                                                                                                                                                                                                                                                                                                                                                                                                                                                                                                                                                                                                                         |
| Article Type:                   | Protocol                                                                                                                                                                                                                                                                                                                                                                                                                                                                                                                                                                                                                                                                                                                                                                                                                                                                                                                                                                                                                       |
| Date Submitted by the Author:   | 13-May-2019                                                                                                                                                                                                                                                                                                                                                                                                                                                                                                                                                                                                                                                                                                                                                                                                                                                                                                                                                                                                                    |
| Complete List of Authors:       | Gerardin, Marie; University hospital of Nantes, Department of Clinical Pharmacology<br>Rousselet, Morgane; University hospital of Nantes, Department of Clinical Pharmacology; INSERM , U1246 SPHERE "methodS in Patient-centered outcomes and HEalth ResEarch"<br>Caillet, Pascal; University hospital of Nantes, Department of Clinical Pharmacology<br>Grall-Bronnec, Marie; University Hospital of Nantes, Clinical Investigation Unit BALANCED "BehaviorAL AddictioNs and ComplEx mood Disorders"; INSERM , U1246 SPHERE "methodS in Patient-centered outcomes and HEalth ResEarch"<br>Loue, Pierre; University Hospital of Rouen, Departement of General medicine<br>Jolliet, Pascale; University hospital of Nantes, Department of Clinical Pharmacology; INSERM , U1246 SPHERE "methodS in Patient-centered outcomes and HEalth ResEarch"<br>Victorri-Vigneau, C; University Hospital of Nantes, Department of Clinical Pharmacology; INSERM , U1246 SPHERE "methodS in Patient-centered outcomes and HEalth ResEarch" |
| <b>Primary Subject Heading</b>: | Pharmacology and therapeutics                                                                                                                                                                                                                                                                                                                                                                                                                                                                                                                                                                                                                                                                                                                                                                                                                                                                                                                                                                                                  |
| Secondary Subject Heading:      | Addiction                                                                                                                                                                                                                                                                                                                                                                                                                                                                                                                                                                                                                                                                                                                                                                                                                                                                                                                                                                                                                      |
| Keywords:                       | zolpidem, secured prescription, change in law, impact, addictovigilance, Substance misuse < PSYCHIATRY                                                                                                                                                                                                                                                                                                                                                                                                                                                                                                                                                                                                                                                                                                                                                                                                                                                                                                                         |
|                                 |                                                                                                                                                                                                                                                                                                                                                                                                                                                                                                                                                                                                                                                                                                                                                                                                                                                                                                                                                                                                                                |

SCHOLARONE™  
Manuscripts

1  
2  
3 **Title:** ZORRO study Protocol – French national health insurance database analysis and field study  
4  
5 focusing on the impact of secure prescription pads on zolpidem consumption and sedative drug  
6  
7 misuse.  
8  
9

10  
11  
12 **Authors:**  
13

14 Marie GERARDIN, Clinical Pharmacology Department, Nantes University Hospital, Nantes,  
15 France, 9 quai Moncousu, 44 093 Nantes cedex 1, France. [marie.gerardin@chu-nantes.fr](mailto:marie.gerardin@chu-nantes.fr)  
16  
17

18 Morgane ROUSSELET, Clinical Pharmacology Department, Nantes University Hospital, Nantes,  
19 France, 9 quai Moncousu, 44 093 Nantes cedex 1, France. Addictology and Psychiatry Department,  
20 Nantes University Hospital, 85 rue de Saint-Jacques, 44093 Nantes cedex 1, France. INSERM U1246  
21 SPHERE “methodS in Patient-centered outcomes and HHealth ResEarch”, Nantes and Tours University,  
22 22 boulevard Benoni Goullin, 44 000 Nantes, France. [morgane.rousselet@chu-nantes.fr](mailto:morgane.rousselet@chu-nantes.fr)  
23  
24  
25  
26  
27

28 Pascal CAILLET, Clinical Pharmacology Department, Nantes University Hospital, Nantes,  
29 France, 9 quai Moncousu, 44 093 Nantes cedex 1, France. [pascal.caillet@chu-nantes.fr](mailto:pascal.caillet@chu-nantes.fr)  
30  
31  
32

33 Marie GRALL-BRONNEC, Addictology and Psychiatry Department, Nantes University Hospital,  
34 85 rue de Saint-Jacques, 44093 Nantes cedex 1, France. INSERM U1246 SPHERE “methodS in Patient-  
35 centered outcomes and HHealth ResEarch”, Nantes and Tours University, 22 boulevard Benoni Goullin,  
36 44 000 Nantes, France. [marie.bronnec@chu-nantes.fr](mailto:marie.bronnec@chu-nantes.fr)  
37  
38  
39  
40  
41  
42

43 Pierre LOUE, General medical Department, Rouen faculty of medicine, Rouen University  
44 Hospital. [peterloue@me.com](mailto:peterloue@me.com)  
45  
46  
47

48 Pascale JOLLIET, Clinical Pharmacology Department, Nantes University Hospital, Nantes,  
49 France, 9 quai Moncousu, 44 093 Nantes cedex 1, France. INSERM U1246 SPHERE “methodS in  
50 Patient-centered outcomes and HHealth ResEarch”, Nantes and Tours University, 22 boulevard Benoni  
51 Goullin, 44 000 Nantes, France. [pascale.jolliet@univ-nantes.fr](mailto:pascale.jolliet@univ-nantes.fr)  
52  
53  
54  
55

56 Caroline VICTORRI-VIGNEAU, Clinical Pharmacology Department, Nantes University Hospital,  
57 Nantes, France, 9 quai Moncousu, 44 093 Nantes cedex 1, France. INSERM U1246 SPHERE “methodS  
58  
59  
60

1  
2  
3 in Patient-centered outcomes and HHealth ResEarch", Nantes and Tours University, 22 boulevard  
4  
5 Benoni Goullin, 44 000 Nantes, France. [caroline.vigneau@chu-nantes.fr](mailto:caroline.vigneau@chu-nantes.fr)  
6  
7

8 **Corresponding author:**

9  
10 Caroline VICTORRI-VIGNEAU

11  
12 Adress: Clinical Pharmacology Department, Nantes University Hospital, Nantes, France,

13  
14 9 quai Moncouso, 44 093 Nantes cedex 1, France

15  
16 Phone : +33240084073

17  
18 E-Mail : [caroline.vigneau@chu-nantes.fr](mailto:caroline.vigneau@chu-nantes.fr)  
19  
20  
21  
22  
23  
24  
25  
26  
27  
28  
29  
30  
31  
32  
33  
34  
35  
36  
37  
38  
39  
40  
41  
42  
43  
44  
45  
46  
47  
48  
49  
50  
51  
52  
53  
54  
55  
56  
57  
58  
59  
60

## ABSTRACT

### Introduction

In recent years, data collected by the French Addictovigilance Network (FAN) has shown the potential for abuse and addiction associated with zolpidem (the most sold hypnotic drug in France). Since the 10<sup>th</sup> of April 2017, new regulations have come into force that require zolpidem to be prescribed on special secure prescription pads, in order to reduce the risk of abuse or misuse. This measure has far-reaching repercussions that are not only limited to the consumption of zolpidem but also extend to the usage of sedative medication on a whole.

The objective of the ZORRO study (ZOlpidem and the Reinforcement of the Regulation of prescription Orders) is to evaluate the overall impact of the new regulatory framework requiring zolpidem to be prescribed on special secure prescription pads. Three axes will be evaluated: the number of consumers, the type of consumption (chronic use versus occasional use, problematic consumption versus non-problematic use), and the consumption of other sedative molecules.

### Methods and analysis

The ZORRO study is an epidemiological, observational, national multi-center, non-controlled, prospective research project supported by the French National Agency for Medicines and Health Products Safety (ANSM). The evaluation of the impact of the regulatory framework change relative to zolpidem will be done according to two axes: via an epidemiological study of the French National Health Insurance database and by the implementation of field studies of prescribers and consumers of zolpidem.

### Ethics and dissemination

The Nantes Research Ethics Committee (Groupe Nantais d'Ethique dans le Domaine de la Santé; GNEDS), the Committee for the Protection of the Population (CPP), and the Committee of Expertise in Research, Studies and Evaluations in the Field of Health (CEREES) approved this study. Results will be presented in national and international conferences and submitted to peer-reviewed journals.

**Trial registration number** NCT03584542

## Keywords

Zolpidem, secured prescription, change in law, impact, addictovigilance, misuse.

## ARTICLE SUMMARY

### Strengths and limitations of the study

This study will contribute to setting up an innovative impact measure in order to evaluate the efficacy of institutions' response to the issue of zolpidem misuse and dependence.

The study will be representative of the French population by use of the French healthcare database SNDS, with a focus on how physicians and problematic consumers have coped with the change in law by use of complementary field studies.

Owing to technical constraints inherent to medico-administrative database use, the use of drugs that are not reimbursed is not be observable in the SNDS database, as well as clinical data that are not routinely gathered.

A lack of representativity may occur during participants' recruitment regarding the part of the project involving field sampling.

## INTRODUCTION

In recent years, zolpidem has been the best-selling hypnotic drug in France. Worldwide, a number of cases of misuse of zolpidem have been described (in Europe and in the United-States [1, 2]). The World Health Organisation (WHO) believes that the frequency of cases of abuse or addiction to zolpidem is similar to that associated with hypnotic benzodiazepines [3]. As a result, Zolpidem has been the target of a number of regulatory framework changes in both French national and international spheres. In particular, the United Nations has placed zolpidem in table IV of the Vienna convention which aims to control the abuse and trafficking of psychotropic substances (ruling of July 15<sup>th</sup> 2002)

In France, the French Addictovigilance network (FAN), piloted by the French National Agency for Medicines and Health Products Safety (Agence Nationale de Sécurité du Médicament et des Produits de Santé; ANSM) is in charge of the surveillance of cases of abuse and addiction associated with any drug or substance with a psychoactive effect. The surveillance is based on a network of 13 Centres for evaluation of and information on drug dependence and addiction monitoring (Centres d'Evaluation et d'Information sur la Pharmacodépendance-Addictovigilance; CEIP-A), who evaluate the addictive potential of a given drug via notifications provided by health professionals [4], and via specifically-developed pharmaco-epidemiology tools [5, 6].

Some controlled medicines and psychotropic substances (including zolpidem) are under reinforced surveillance by the ANSM as they are associated with a risk of misuse and addiction. In France, zolpidem is enlisted on the list I of harmful substances, that is to say, it is considered as a substance associated with a health risk. An initial national survey of the addictovigilance network in 2002 found serious and worrying cases of abuse and addiction to zolpidem. The 2002 survey revealed the existence of two consumer groups: a population of chronic high dosage consumers with a therapeutic usage of zolpidem, and a population of "misusers" in search of an effect other than hypnotic (euphoria, wellbeing or stimulant effect). The same survey also found, via the analysis of the FAN pharmaco-epidemiology tools, that zolpidem is a substance prone to abuse [7]. Following to

1  
2  
3 this conclusion, the Summary of Product Characteristics (SPC) of zolpidem was modified, with  
4 notably the addition of a warning with respect to addiction. In June 2011, an update of data relative  
5 to the addictive potential of zolpidem found the same two consumer groups as in the 2002 survey  
6 with cases of increasing severity associated with the consumption of particularly high dosages [8]. In  
7 light of these results, the prescription of zolpidem on special secure prescription pads was put  
8 forward by the National Commission of Narcotics and Psychotropic Substances (Commission  
9 Nationale des Stupéfiants et Psychotropes; CNSP). In 2012, the FAN tools all, once again, proclaim  
10 zolpidem as a problematic substance.

11  
12 The surveillance tools of the FAN allow for the identification of the problem of addiction in specific  
13 population groups, but they do not provide a general population risk profile. However, the analysis of  
14 quantitative data, in the French National Health Insurance database, relative to the usage of  
15 zolpidem and zopiclone in the general population [9], provided the identification of a number of  
16 different clinical profiles of zolpidem consumers: (i) « non-problematic » consumers, the largest  
17 group; (ii) individuals who could have developed a tolerance to the hypnotic effects of zolpidem, for  
18 whom the prescription of alternative hypnotic/anxiolytic medication is justified; (iii) potential  
19 problematic consumers of zolpidem (1%) (high rate of fraudulent behaviour, excessive usage, non-  
20 respect of guidelines and medical-pharmaceutical nomadism). In 2017, another research program  
21 gave insight into the characteristics of the two aforementioned consumer groups via the analysis of  
22 reports from health professionals [10].

23  
24 Following to these results, on the 11<sup>th</sup> of January 2017, the ANSM decreed that as from April the 10<sup>th</sup>  
25 2017, the prescription of zolpidem was to be done on secure prescription pads [11]. The ANSM  
26 stated that « this measure is taken in order to limit the risk of abuse and misuse » and « to  
27 encourage correct usage ». In a country where the consumption of psychotropic drugs is high, a  
28 ruling that impacts the most sold hypnotic drug [12, 13] will disrupt not only its' usage but also on a  
29 larger scale the overall prescription of sedative substances (hypnotics and anxiolytics). The current  
30 project aims to develop a means to measure the impact of this new ruling, in the scope of works of  
31  
32  
33  
34  
35  
36  
37  
38  
39  
40  
41  
42  
43  
44  
45  
46  
47  
48  
49  
50  
51  
52  
53  
54  
55  
56  
57  
58  
59  
60



1  
2  
3 the ANSM, that is to say, in terms of the reduction of the risk of abuse, the improvement of correct  
4 use of zolpidem and the change in prescriptions of sedative molecules. This project forms part of the  
5 evaluation of zolpidem done by the Nantes CEIP-A, the organization in charge of its follow up. In  
6 addition to the tools used by the FAN [5], this project will allow for a longitudinal evaluation of the  
7 trajectories of different patients, as well as providing insight into the general population.  
8  
9  
10  
11  
12  
13  
14  
15

## 16 **METHODS AND ANALYSIS**

### 17 **Aim**

18  
19 The objective of the ZORRO study (ZOlpidem and the Reinforcement of the Regulation of prescription  
20 Orders) is to evaluate the overall impact of the obligation to use secure prescription pads for  
21 zolpidem. We propose a multimodal approach that will provide valuable insight into three key  
22 questions: 1) what is the impact of this measure on the number of consumers? 2) What is the impact  
23 of this measure on the type of consumption? 3) What is the impact of this measure on the  
24 consumption of other sedative molecules?  
25  
26  
27  
28  
29  
30  
31  
32  
33

### 34 **Study design**

35  
36 This scientific project is based on a multimodal epidemiological approach, which combines a  
37 retrospective cohort study and a transversal field study. The cohort study draws from the French  
38 National Health Information database (Système National des Données de Santé; SNDS, formerly  
39 known as the French National Inter-schemes Health Insurance database (Système National  
40 d'Information Inter-Régimes de l'Assurance Maladie; SNIIRAM)) [14]. The transversal field study  
41 involves the gathering in-field of clinical data of different populations: general practitioners, that  
42 prescribe zolpidem, as well as consumers (both patients having consulted a general practitioner and  
43 those having recourse to specialized care centers dedicated to drug dependence). To our knowledge,  
44 a study of this amplitude does not exist in France.  
45  
46  
47  
48  
49  
50  
51  
52  
53  
54

55  
56 These two approaches will provide insight into three key areas:  
57  
58  
59  
60

- 1  
2  
3 - To evaluate the impact of the measure on the number of consumers, we will estimate via the  
4 SNDS database the prevalence and the incidence of zolpidem consumers in the general  
5 population before and after the regulatory framework change.  
6  
7  
8  
9  
10 - To evaluate the impact of the measure on the type of consumption, we will explore the  
11 changes in the modes of consumption: occasional use *versus* chronic use and problematic  
12 use *versus* non-problematic use. Problematic use is defined as consumption outside of the  
13 SPC guidelines for at least one of the following parameters: the duration of consumption, the  
14 dosage, the means of procurement, the routes of administration or the search for an effect  
15 other than hypnotic. This evaluation will be done both from SNDS database for the  
16 evaluation of the general population and from the field studies for the evaluation of  
17 problematic consumers of zolpidem (patients of general practitioners and users of  
18 specialized care centers dedicated to drug dependence).  
19  
20  
21  
22  
23  
24  
25  
26  
27  
28  
29  
30 - To evaluate the impact of the measure on the consumption of other sedative molecules, we  
31 will analyze the reporting of prescriptions and the changes observed both in the general  
32 population in the SNDS database as well as among prescribers and problematic consumers of  
33 zolpidem (patients of general practitioners and users of drug-user risk reduction centers or  
34 specialized care centers dedicated to drug dependence).  
35  
36  
37  
38  
39  
40

### 41 **Setting of the study**

42  
43 The Nantes CEIP-A, is the national investigating center in charge of the management, surveillance  
44 and coordination of the entire project. General practitioners, their patients and users of zolpidem  
45 will be recruited across France. Recruitment as well as the gathering and the analysis of data (SNDS  
46 database and field studies) will be done by the Nantes CEIP-A.  
47  
48  
49

50  
51  
52 A multi-disciplinary pilot committee, comprised of pharmacologists, general practitioners, a  
53 methodologist bio-statistician, a clinical study technician and of an addictologist psychiatrist, has  
54 been constituted in order to define the research protocol and in order to insure the scientific and  
55 methodological validity of the study.  
56  
57  
58  
59  
60

## Patient and public involvement

Patients were not involved in the design of the study.

## Populations

### *Analysis of the SNDS database*

The study sample will include all patients in the database during the period from the 1<sup>st</sup> of January 2016 to the 31<sup>st</sup> of December 2018. The target population of our research will be constituted of consumers of zolpidem included in the SNDS database between the 1<sup>st</sup> of January 2016 and the 31<sup>st</sup> of December 2018.

### *Field study among General practitioners*

Practitioners, situated within the national borders, will be randomly selected from the list of the National Health Insurance for Wage laborers (Caisse Nationale de l'Assurance Maladie des Travailleurs Salariés; CNAMTS). Practitioners specialized in the care of addictions and used to working with the FAN, will also be solicited [15]. Practitioners with an independent practice at the time of change in regulatory framework and who agree to participate, via oral consent, will be included. The inclusion period will run from the second quarter of 2018 to the end of 2019.

### *Field study among problematic consumers of zolpidem (patients of general practitioners and users of specialized care centers dedicated to drug dependence)*

Participating practitioners will select patients who presented a problematic use of zolpidem before the coming into force of the new regulatory framework. Patients will be included in the study if they provide their oral consent to participate. Participating practitioners will give them a questionnaire to complete in the waiting room and return in a sealed envelope. Participating specialized care centers

1  
2  
3 dedicated to drug dependence (Centre de Soins, d'Accompagnement et de Prévention en  
4 Addictologie; CSAPA) and drug-user risk reduction centers (Centre d'Accueil et d'Accompagnement à  
5 la Réduction des risques pour Usagers de Drogues; CAARUD) will select users who presented a  
6  
7 problematic use of zolpidem before the coming into force of the new regulatory framework. The  
8  
9 inclusion period for patients and users will be the same as for general practitioners (second quarter  
10  
11 of 2018 to the end of 2019). Users will be included in the study if they provide their oral consent to  
12  
13 participate. The facility staff will provide them with a questionnaire to complete. A problematic  
14  
15 consumption of zolpidem is defined according to the Diagnostic and Statistical Manual of Mental  
16  
17 Disorders 5<sup>th</sup> edition (DSM-5) criteria of Substance Use Disorder. Under aged or protected individuals  
18  
19 as well as subjects with French language difficulties (understanding, reading or writing) incompatible  
20  
21 with the filling out of a questionnaire, will not be included in the study.  
22  
23  
24  
25  
26  
27  
28  
29

## 30 **Materials**

### 31 *Analysis of the SNDS database*

32  
33 The SNDS database is described in detail in the publication by Bezin *et al* [14] as well as on related  
34  
35 internet sites [16, 17]. The SNDS links several existing databases: the SNIIRAM, the nationwide claims  
36  
37 database of the French National Healthcare system; the national hospital database (Programme de  
38  
39 Médicalisation des Systèmes d'Information; PMSI) and the national death registry (Centre  
40  
41 d'épidémiologie sur les causes médicales de Décès; CeperDC). The SNDS covers more than 98% of the  
42  
43 French population (66 million people) from birth (or immigration) to death (or emigration), even in  
44  
45 case of change in occupation or retirement. Data are individual and anonymous. The SNDS contains a  
46  
47 longitudinal record of health encounters, hospital diagnoses and drugs deliveries relative to  
48  
49 outpatient medical care claims, including all reimbursed drugs, information from hospital discharge  
50  
51 summaries, and date of death.  
52  
53  
54  
55  
56  
57  
58  
59  
60

### *Field study among general practitioners*

1  
2  
3 Participating general practitioners will reply to short telephone questionnaire, which will gather  
4  
5 information on their perceptions and their prescription strategy following to the new regulatory  
6  
7 framework (continuation of zolpidem on a secure prescription pad, prescription of a different  
8  
9 sedative drug, or cease in hypnotic prescriptions). The criteria for their choices will also be explored.  
10  
11  
12

#### 13 14 *Field study among problematic consumers of zolpidem (patients and users)*

15  
16 Patients and users will fill out a two-part auto-questionnaire. The first part will evaluate the  
17  
18 consumption of zolpidem before the coming into force of the new regulatory framework (dosages  
19  
20 used, duration, pursued effects and effects felt) and their change or not after the coming into force  
21  
22 of the new regulatory framework (cease, change in dosage, relay to another drug or sedative  
23  
24 substance). The second part of the questionnaire will be filled out only by patients or users for whom  
25  
26 a change is observed and it will gather information pertaining to the favored replacement substance  
27  
28 (dosages used, duration, pursued effects and effects felt). General practitioners and staff of the  
29  
30 CSAPA and CCARUD will return the completed questionnaires to the CEIP-A in Nantes for analysis.  
31  
32  
33  
34  
35

#### 36 **Study size**

##### 37 38 39 40 *Analysis of the SNDS database:*

41  
42 In light of the retrospective nature of the study and of the databases used, the calculation of a power  
43  
44 is not necessary, in accordance with the good practice guidelines of the European Network of  
45  
46 Centers for Pharmaco-epidemiology and Pharmacovigilance [18].  
47  
48  
49  
50

##### 51 52 *Field studies among prescribing general practitioners and problematic consumers of zolpidem:*

53  
54 Three hundred practitioners will be selected in order to insure that at least one hundred  
55  
56 practitioners participate in the recruitment of problematic consumers of zolpidem. For feasibility  
57  
58 reasons, the number of general practitioner patients to be included depends upon the construction  
59  
60

1  
2  
3 of a convenience sample. This sample is estimated to be about 200 patients. Furthermore, 200 users  
4  
5 will be recruited via the specialized care centers dedicated to drug dependence.  
6  
7  
8  
9

### 10 **Statistical methods**

11 All variables will undergo a descriptive analysis. Quantitative variables will be described using usual  
12 position (mean or median) and dispersion (standard deviation, interquartile range) parameters. The  
13 normality of their distribution will be assessed numerically (normality test) and graphically. For  
14 normally distributed quantitative variables, mean and standard deviation will be used. For non-  
15 normally distributed variables, median and interquartile ranges will be used. Qualitative variables will  
16 be described using number and frequency tables for each parameter. All analysis will be conducted  
17 with SAS software. Specific statistical methods will be implemented in order to answer each question  
18 adequately.  
19  
20  
21  
22  
23  
24  
25  
26  
27  
28  
29  
30  
31

32 *Impact of the measure on the number of consumers: estimation of prevalence and incidence of*  
33 *zolpidem users within the SNDS database before and after the regulatory framework change*  
34  
35  
36

37 A number of periods will be studied (figure 1). The proportion of patients having received at least  
38 one delivery of zolpidem during the period 2 and during the period 4 will be compared using a Mc  
39 Nemar test for paired proportion. Patients missing from one of the two periods will be recorded as  
40 non-users. The significance threshold will be fixed at 5%. An incident user will be defined as a patient  
41 receiving a first delivery of zolpidem without any prior delivery over the preceding 6 months. The  
42 number of incident users within each period will be compared using a Poisson model. The  
43 significance threshold for each coefficient will be fixed at 5%.  
44  
45  
46  
47  
48  
49  
50  
51  
52  
53  
54

55 *Impact on the type of consumption regarding changes in treatment duration*  
56

57 *Within the SNDS database:* The length of the first treatment episode will be evaluated by  
58 calculating the number of days covered by the initial delivery (theoretical length of treatment). The  
59  
60

1  
2  
3 predicted variable will be the duration of treatment over a threshold (yes/no). The period will be  
4 entered as a covariate in the model, enabling the study of the effect of the period on the probability  
5 of the treatment being chronic while taking into account the correlation of treatment characteristics  
6 for a given patient.  
7  
8  
9  
10

11 *Within the field study among problematic consumers of zolpidem:* A descriptive analysis will  
12 be performed, with the characterization of the duration of treatment with zolpidem before the  
13 regulatory framework change and of the duration of treatment with zolpidem or of the replacement  
14 drug/substance after the regulatory framework change.  
15  
16  
17  
18  
19

20  
21  
22  
23 *Impact on the type of consumption addressing changes in the type of consumption, problematic or*  
24 *non-problematic*  
25  
26

27 *Within the SNDS database:* A latent class analysis (LCA) will be conducted within each period,  
28 including the following variables: age, sex, presence of a chronic disease, poor economic status,  
29 prescribing practitioners specialty (only whether or not a general practitioner), number of different  
30 prescribing practitioners (doctor shopping), number of dispensing pharmacies (pharmacy shopping),  
31 excess use (mean monthly medication possession ratio [19] (MPR) > 1 during the period), adherence  
32 to French good practice guidelines regarding hypnotics (encompassing the absence of association  
33 with others benzodiazepines), presence of an associated psychiatric disorder (identified by  
34 concomitant drug use, i.e opioids substitution treatments, psycholeptic and psychoanaleptic drugs).  
35 The analysis will be repeated during periods 2 and 4. In order to study the transitions between  
36 clusters over time, a latent transition analysis (LTA) will be performed. The choice of the best model  
37 will be made considering Bayesian Information Criterion (BIC). The choice of the best model will also  
38 be made with consideration to the stability of the model (proportion of convergences among the  
39 5000 iterations), the BIC (lower is better) and the interpretability of the model.  
40  
41  
42  
43  
44  
45  
46  
47  
48  
49  
50  
51  
52  
53  
54  
55  
56  
57  
58  
59  
60

1  
2  
3           *Within the field observational study among problematic consumers of zolpidem:* A descriptive  
4 analysis will be performed. We will compare the number and the distribution of the positive criteria  
5 of problematic consumers (patients et users) before (for zolpidem treatment) and after the coming  
6 into force of the new regulatory framework (for zolpidem treatment or replacement substances):  
7 duration of consumption, dosage, manner in which zolpidem or other substance is obtained, route of  
8 administration or pursued effects different from the expected effect of the treatment or substance.  
9 Parametric or non-parametric paired-tests will be used for comparisons, according to the  
10 distributions of each variable. For each hypothesis test, an alpha risk of 5% will be used. In case of  
11 multiple testing, a correction of the significance threshold will be applied to avoid alpha risk inflation  
12 (Hochberg's method).  
13  
14  
15  
16  
17  
18  
19  
20  
21  
22  
23  
24  
25  
26  
27

28           *Impact on the consumption of other sedative molecules: analysis of prescription deferrals and*  
29 *switches*  
30  
31

32           *Within the SNDS database, regarding characterization of consumption trajectories:*

33 Firstly, a time series analysis will be performed on aggregated monthly data (proportion of users per  
34 month) to compare the changes in the consumption of zolpidem and other sedatives across all the  
35 study periods. Cross-correlation between the different time series will be studied in order to identify  
36 if zolpidem users have shifted their consumption to other drugs since the change in regulatory  
37 framework. Secondly, a sequence analysis will be performed using dedicated tools (TramineR,  
38 SeqHMM and arulesSequences packages in R software). This will include a cluster analysis of the  
39 sequences, in order to identify typical trajectories in consumption and their modification following to  
40 the change in the regulatory framework.  
41  
42  
43  
44  
45  
46  
47  
48  
49  
50  
51

52           *Within the field study among physicians:* A descriptive analysis of changes in prescription  
53 behaviour and motives for change will be performed.  
54  
55

56           *Within the field study among problematic consumers of zolpidem:* A descriptive analysis of  
57 the number of molecules tried as a replacement and the molecules that best replaced zolpidem, if  
58  
59  
60



1  
2  
3 applicable, after the change in regulatory framework, will be performed. In patients stopping  
4 zolpidem, but switching to another molecule, a univariate analysis of the same variables will be  
5  
6 conducted in order to describe the use of zolpidem before the coming into force of the new  
7  
8 regulatory framework and the use of other sedative drugs used in place of zolpidem after the coming  
9  
10 into force of the new regulatory framework. For each hypothesis test, an alpha risk of 5% will be  
11  
12 used. In case of multiple testing, a correction of the significance threshold will be applied to avoid  
13  
14 alpha risk inflation (Hochberg's method).  
15  
16  
17  
18  
19  
20

## 21 **DISCUSSION**

22  
23  
24  
25 The evaluation of the addictive power of zolpidem by the addictovigilance network required over the  
26  
27 past, above and beyond the tools of the CEIP-A, the implementation of specific research programs.  
28  
29 The evaluation of the impact of the change in the regulatory framework will similarly require the  
30  
31 implementation of specific research programs. This project offers a design and a methodology which  
32  
33 are complementary to the tools of the CEIP-A [4], indispensable to the measurement of the impact,  
34  
35 which we believe to be major, of a change in the prescription requirements of the most sold hypnotic  
36  
37 in France. The ZORRO project aims to develop a method to measure the impact of the change in  
38  
39 regulatory framework on practitioners' prescriptions of sedative molecules. This evaluation is  
40  
41 complex, as in order to be thorough it must precisely measure the different aspects of the  
42  
43 consequences of the regulatory framework change, both from a quantitative and qualitative point of  
44  
45 view. Rather than doing a single study, we prefer to employ a strategy based on a number of  
46  
47 different, and complementary, methodological approaches. We have anticipated some possible bias:  
48  
49 for the analysis of information from a database, we chose the data from the SNDS database as it  
50  
51 contains information close to that of the real consumption. In the absence of available data on the  
52  
53 drugs actually taken by patients, this database provides information on the drugs that patients  
54  
55 obtain from pharmacies, which is more accurate than sales data for example. Concerning the periods  
56  
57  
58  
59  
60

1  
2  
3 of reference before and after, we have voluntarily chosen periods distant from the times of  
4 announcement and the coming into force of the change in regulatory framework in order to  
5 minimize bias linked to the transition period. Although the regulatory framework change came into  
6 force in April 2017, the ANSM had published information on the measure as from January 2017. A  
7 part of the practitioners prescribing zolpidem therefore anticipated the change in the regulatory  
8 framework and started to change their prescription strategy as from January 2017. One of the limits  
9 of the SNDS database, that justifies our multimodal approach, is the complete absence of clinical  
10 information concerning the effects pursued or felt by patients, as well as the modification in routes  
11 of administration. Concerning the in-field clinical study, the principal bias is a memory bias of the  
12 questioned subjects. The time between the change in the regulatory framework and the  
13 implementation of the study is however incompressible as it is necessary to give patients and users  
14 sufficient hindsight in order to evaluate the changes in their consumption of zolpidem. In fact, the  
15 questions have been formulated in a simplified manner, and our project targets the most  
16 problematic consumers, who should remember with little difficulty the changes, having an impact on  
17 their daily lives, following to the new regulatory framework. A possible declarative bias does exist  
18 among patients and users, although this bias was taken into account, in order to minimize it, in the  
19 conception of the questionnaire. On the one hand the questionnaire is completely anonymous. On  
20 the other hand, for patients, the questionnaire is filled-in away from any medical presence and  
21 handed back in a sealed envelope that is opened only by the Nantes CEIP-A for data analysis. The  
22 CEIP-A personnel are accustomed to interviewing subjects recruited via specialized care centers  
23 dedicated to drug dependence on their substance consumption, in the framework of their mission of  
24 surveillance of addition and abuse of psychoactive substances. Our personnel have therefore  
25 developed an expertise in the realization of projects of this type among the users of specialized care  
26 centers dedicated to drug dependence. The strengths of this project lie within its' multimodal  
27 approach. It allows, on the one hand, to document numerous possible consequences of the  
28 regulatory framework change, and on the other hand, to insure the overall coherence of the  
29  
30  
31  
32  
33  
34  
35  
36  
37  
38  
39  
40  
41  
42  
43  
44  
45  
46  
47  
48  
49  
50  
51  
52  
53  
54  
55  
56  
57  
58  
59  
60

1  
2  
3 different studies via the management by an expert team in the field, coordinated by the French  
4 national reference center on the addictive potential of zolpidem. This project may very well have a  
5 double impact: on the one hand, it will provide additional data essential to the ANSMs' mission of  
6 surveillance of the risk relative to overdose, abuse, addiction and misuse of sedative substances; on  
7 the other hand, this project could be the defining point of a series of steps (for example  
8 communication and information campaigns) designed to manage the public health issues  
9 surrounding zolpidem and to measure their overall impact.  
10  
11  
12  
13  
14  
15  
16  
17  
18  
19  
20

## 21 **ETHICS AND DISSEMINATION:**

### 22 **Ethics approval**

23  
24 The Committee for the Protection of the Population (CPP) approved the protocol on the 11/06/2018,  
25 the local Research Ethics Committee (Groupe Nantais d'Ethique dans le Domaine de la Santé; GNEDS)  
26 on the 05/03/2018 and the Committee of Expertise in Research, Studies and Evaluations in the Field  
27 of Health (CEREES) on the 12/04/2018. The National Commission of Information Technology and  
28 Liberties (CNIL) gave a favorable opinion.  
29  
30  
31  
32  
33  
34  
35

### 36 **Information to participants**

37 For the epidemiological analysis of the SNDS database: not applicable

38  
39 Practitioners: all practitioners will receive clear information regarding the study orally during the  
40 telephone interview. Practitioners that participate in the recruitment of patients will also receive  
41 written information.  
42  
43  
44  
45  
46

47 Patients and users: general practitioners and the study agents in the specialized care centers  
48 dedicated to drug dependence agree to inform all patients and users, in a clear and impartial  
49 manner, about the protocol. They will also provide written information.  
50  
51  
52  
53

### 54 **Consent to participate**

55 For the epidemiological analysis of the SNDS database: not applicable  
56  
57  
58  
59  
60

1  
2  
3 Practitioners: oral non-refusal to participate will be sought before delivery of the telephone  
4 questionnaire. Practitioners that accept to reply to the telephone questionnaire will be considered as  
5  
6 not in opposition of the study. For the recruitment of patients, practitioners that fill in the  
7  
8 documents relative to the inclusion of a patient will be considered as agreeing to participate in the  
9  
10 study.  
11  
12

13  
14 Patients and users: oral non-refusal from patients and users will be sought. Subjects (patients or  
15  
16 users) that fill out an auto questionnaire will be considered as agreeing to participate in the study.  
17

### 18 **Consent for publication**

19  
20 The written information documents provided to practitioners, patients and users, state that the  
21  
22 anonymous information gathered during the study is likely to be used in scientific publications and  
23  
24 public communications.  
25  
26

### 27 **Availability of data and material**

28  
29 Not applicable  
30

### 31 **Figure legends**

32  
33  
34 Figure 1: Periods of study of the SNDS database  
35  
36  
37  
38  
39  
40  
41  
42  
43  
44  
45  
46  
47  
48  
49  
50  
51  
52  
53  
54  
55  
56  
57  
58  
59  
60

**REFERENCES**

1. Hajak G, Müller WE, Wittchen HU, Pittrow D, Kirch W. Abuse and dependence potential for the non-benzodiazepine hypnotics zolpidem and zopiclone: a review of case reports and epidemiological data. *Addict Abingdon Engl*. 2003;98:1371–8.
2. Yen C-F, Yen C-N, Ko C-H, Hwang T-J, Chen C-S, Chen T-T, et al. Correlates of dependence and beliefs about the use of hypnotics among zolpidem and zopiclone users. *Subst Use Misuse*. 2015;50:350–7.
3. WHO Expert Committee on Drug Dependence : thirty-first report. 1999. <http://apps.who.int/iris/handle/10665/42285>. Accessed 17 Aug 2018.
4. Jouanjus E, Gibaja V, Kahn J-P, Haramburu F, Daveluy A. Signal identification in addictovigilance: the functioning of the French system. *Therapie*. 2015;70:113–31.
5. Micallef J, Jolliet P, Victorri-Vigneau C, Mallaret M, Richard N, Haramburu F, et al. [First meeting of the French CEIP (centres d'évaluation et d'information sur la pharmacodépendance). Assessment of the abuse and pharmacodependence potential during drug development]. *Therapie*. 2008;63:55–65.
6. Jouanjus E, Guernec G, Lapeyre-Mestre M, French Addictovigilance Network. Medical prescriptions falsified by the patients: a 12-year national monitoring to assess prescription drug diversion. *Fundam Clin Pharmacol*. 2018;32(3):306-322.
7. Victorri-Vigneau C, Dailly E, Veyrac G, Jolliet P. Evidence of zolpidem abuse and dependence: results of the French Centre for Evaluation and Information on Pharmacodependence (CEIP) network survey. *Br J Clin Pharmacol*. 2007;64:198–209.
8. Victorri-Vigneau C, Gérardin M, Rousselet M, Guerlais M, Grall-Bronnec M, Jolliet P. An update on zolpidem abuse and dependence. *J Addict Dis*. 2014;33:15–23.

- 1  
2  
3 9. Victorri-Vigneau C, Feuillet F, Wainstein L, Grall-Bronnec M, Pivette J, Chaslerie A, et al.  
4  
5 Pharmacoepidemiological characterisation of zolpidem and zopiclone usage. *Eur J Clin Pharmacol*.  
6  
7 2013;69:1965–72.  
8  
9  
10  
11 10. Rousselet M, Feuillet F, Gerardin M, Jolliet P, Hardouin J-B, Victorri-Vigneau C. The French  
12  
13 addictovigilance network clinical assessment: Z-drugs, true false twins. *Expert Opin Drug Saf*.  
14  
15 2017;16:1063–9.  
16  
17  
18 11. ANSM : Agence nationale de sécurité du médicament et des produits de santé. Prescription  
19  
20 obligatoire du zolpidem sur ordonnance sécurisée - Point d'Information. 2017.  
21  
22 [http://www.ansm.sante.fr/S-informer/Points-d-information-Points-d-information/Prescription-](http://www.ansm.sante.fr/S-informer/Points-d-information-Points-d-information/Prescription-obligatoire-du-zolpidem-sur-ordonnance-securisee-Point-d-Information)  
23  
24 [obligatoire-du-zolpidem-sur-ordonnance-securisee-Point-d-Information](http://www.ansm.sante.fr/S-informer/Points-d-information-Points-d-information/Prescription-obligatoire-du-zolpidem-sur-ordonnance-securisee-Point-d-Information). Accessed 17 Apr 2018.  
25  
26  
27  
28 12. ANSM : Agence nationale de sécurité du médicament et des produits de santé. Etat des lieux en  
29  
30 2013 de la consommation des benzodiazépines en France - Point d'Information. 2014.  
31  
32 [http://ansm.sante.fr/S-informer/Points-d-information-Points-d-information/Etat-des-lieux-en-2013-](http://ansm.sante.fr/S-informer/Points-d-information-Points-d-information/Etat-des-lieux-en-2013-de-la-consommation-des-benzodiazepines-en-France-Point-d-Information)  
33  
34 [de-la-consommation-des-benzodiazepines-en-France-Point-d-Information](http://ansm.sante.fr/S-informer/Points-d-information-Points-d-information/Etat-des-lieux-en-2013-de-la-consommation-des-benzodiazepines-en-France-Point-d-Information). Accessed 17 Apr 2018.  
35  
36  
37  
38 13. ANSM : Agence nationale de sécurité du médicament et des produits de santé. Etat des lieux de  
39  
40 la consommation des benzodiazépines - Point d'Information. 2017. [http://ansm.sante.fr/S-](http://ansm.sante.fr/S-informer/Points-d-information-Points-d-information/Etat-des-lieux-de-la-consommation-des-benzodiazepines-Point-d-Information)  
41  
42 [informer/Points-d-information-Points-d-information/Etat-des-lieux-de-la-consommation-des-](http://ansm.sante.fr/S-informer/Points-d-information-Points-d-information/Etat-des-lieux-de-la-consommation-des-benzodiazepines-Point-d-Information)  
43  
44 [benzodiazepines-Point-d-Information](http://ansm.sante.fr/S-informer/Points-d-information-Points-d-information/Etat-des-lieux-de-la-consommation-des-benzodiazepines-Point-d-Information). Accessed 17 Apr 2018.  
45  
46  
47  
48 14. J. Bezin, M. Duong, R. Lassalle, C. Droz, A. Pariente, P. Blin, et al. The national healthcare system  
49  
50 claims databases in France, SNIIRAM and EGB: powerful tools for pharmacoepidemiology.  
51  
52 *Pharmacoepidemiol. Drug Saf.*, 26 (8) (2017), pp. 954-962  
53  
54  
55  
56 15. Moracchini C, Orleans V, Miloudi S, Frauger E, Micallef J, Thirion X, et al. [General Practitioners'  
57  
58 Contribution to Dependence Assessment: the OPEMA Programme]. *Therapie*. 2012;67:397–404.  
59  
60

1  
2  
3 16. Accueil | SNDS. <https://www.snds.gouv.fr/SNDS/Accueil>. Accessed 28 Jun 2018.  
4  
5

6 17. ameli.fr - Sniiram. [https://www.ameli.fr/l-assurance-maladie/statistiques-et-](https://www.ameli.fr/l-assurance-maladie/statistiques-et-publications/sniiram/finalites-du-sniiram.php)  
7  
8 publications/sniiram/finalites-du-sniiram.php. Accessed 28 Jun 2018.  
9

10  
11 18. The European Network of Centres for Pharmacoepidemiology and Pharmacovigilance (ENCEPP).  
12 Guide on Methodological Standards in Pharmacoepidemiology (Revision 5) EMA/95098. 2010.  
13  
14 [http://www.encepp.eu/standards\\_and\\_guidances/](http://www.encepp.eu/standards_and_guidances/). Accessed 17 Apr 2018.  
15  
16  
17

18  
19 19. Sattler ELP, Lee JS, Perri M. Medication (re)fill adherence measures derived from pharmacy  
20 claims data in older Americans: a review of the literature. *Drugs Aging*. 2013;30:383–99.  
21  
22  
23

#### 24 25 **AUTHOR STATEMENT**

26 MG contributed to the questionnaires development and wrote the first draft of the manuscript.  
27  
28

29  
30 MR wrote the first draft of the protocol, contributed to the questionnaires development and to the  
31 manuscript redaction.  
32  
33

34  
35 PC designed statistical analysis of the SNDS database and contributed to the manuscript redaction.  
36  
37

38 MGB provided her expertise in the area of addictology. She contributed to the preparation of the  
39 zolpidem problematic consumers' questionnaire and validated their relevance to evaluate  
40 problematic use.  
41  
42  
43  
44

45  
46 PL contributed to the questionnaires development.  
47  
48

49 PJ validated the final draft of the protocol and the manuscript.  
50

51 CVV is responsible for the project management. She designed the study and finalized the protocol.  
52

53 All authors read and approved the final manuscript.  
54  
55  
56  
57

#### 58 59 **FUNDING STATEMENT**

60

1  
2  
3 This work was supported by ANSM grant number AAP-2017-027  
4

5 **COMPETING INTERESTS**  
6

7 None declared.  
8  
9

10 **ACKNOWLEDGEMENTS**  
11

12 We would like to thank, in addition to the authors, all who have worked on this project in order to  
13 make it possible : Marie-Lyne Pinot for her help in the elaboration of the call to tender, Léa Ferrand  
14 for her work with the regulatory bodies, all the CEIP-A for their valuable participation in the  
15 recruitment of practitioners as well as the specialized care centers dedicated to drug dependence of  
16 their respective regions. We would also like to thank the ANSM for the financial support they  
17 provided so that this research project may be completed, and the Nantes University Hospital for the  
18 payment of publication charges of this manuscript.  
19  
20  
21  
22  
23  
24  
25  
26  
27

28 **WORD COUNT**  
29

30 4209  
31  
32  
33  
34  
35  
36  
37  
38  
39  
40  
41  
42  
43  
44  
45  
46  
47  
48  
49  
50  
51  
52  
53  
54  
55  
56  
57  
58  
59  
60



**Figure 1: Periods of study of the SNDS database**

1  
2  
3  
4  
5  
6  
7  
8  
9  
10  
11  
12  
13  
14  
15

First information by ANSM about future regulatory framework change

Regulatory framework change of zolpidem

| 2016                                                               |     |     |     |     |     | 2017                                                 |     |     |     |     |     | 2018                                                                                  |     |     |     |     |     |                                                     |     |     |     |     |     |                                                                            |     |     |     |     |     |     |     |     |     |     |     |
|--------------------------------------------------------------------|-----|-----|-----|-----|-----|------------------------------------------------------|-----|-----|-----|-----|-----|---------------------------------------------------------------------------------------|-----|-----|-----|-----|-----|-----------------------------------------------------|-----|-----|-----|-----|-----|----------------------------------------------------------------------------|-----|-----|-----|-----|-----|-----|-----|-----|-----|-----|-----|
| Jan                                                                | Feb | Mar | Apr | May | Jun | Jul                                                  | Aug | Sep | Oct | Nov | Dec | Jan                                                                                   | Feb | Mar | Apr | May | Jun | Jul                                                 | Aug | Sep | Oct | Nov | Dec | Jan                                                                        | Feb | Mar | Apr | May | Jun | Jul | Aug | Sep | Oct | Nov | Dec |
| <b>PERIOD 1</b><br>Assessment of eligibility criteria for period 2 |     |     |     |     |     | <b>PERIOD 2</b><br>Period of reference <b>BEFORE</b> |     |     |     |     |     | <b>PERIOD 3</b><br>Transition phase – Assessment of eligibility criteria for period 4 |     |     |     |     |     | <b>PERIOD 4</b><br>Period of reference <b>AFTER</b> |     |     |     |     |     | <b>PERIOD 5</b><br>Measure of the persistence of the effect of the measure |     |     |     |     |     |     |     |     |     |     |     |

ANSM: French National Agency for Medicines and Health Products Safety

17  
18  
19  
20  
21  
22  
23  
24  
25  
26  
27  
28  
29  
30  
31  
32  
33  
34  
35  
36  
37  
38  
39  
40  
41
